# Supplementary material for: The remission status of AML patients after allo-HCT is associated with a distinct single-cell bone marrow T-cell signature
Source: PubMed Central journal article supplement — Blood. 2024 Jan 11;143(13):1269–81. doi: 10.1182/blood.2023021815 (PMC10997908; doi:10.1182/blood.2023021815), 2024-01-11

1 **The remission status of AML patients after allo-HCT is associated with a distinct**  
2 **single-cell bone marrow T-cell signature**

3 **Mathioudaki et al.**

4 I. Supplemental Methods

5 II. Supplemental Figure Legends

6 III. Supplemental Table Legends

7 **I. Supplemental Methods**

8 **Sample collection**

9 All patients received a similar immunosuppressive regimen at the time of BM aspiration  
10 (calcineurin inhibitor alone or with mycophenolate). For the validation cohort, 338 BM aspirates  
11 from 139 AML patients were collected in an unbiased way and retrospectively grouped by time  
12 point prior to and post allo-HCT. Cells were processed by red blood cell lysis followed by  
13 staining with different antibody cocktails (see Flow cytometry).

14 **Sample preparation and cell sorting for scRNA-seq**

15 For the scRNA-seq experiment, frozen Ficoll-processed BM samples were thawed at 37°C in  
16 a water bath and subsequently transferred to 10 mL pre-warmed thawing media (IMDM Gibco  
17 #21980 with 20% FBS (Sigma-Aldrich #F5724) and 0.1 mg/mL DNase I (Sigma-Aldrich  
18 #DN25). Cells were centrifuged at 250 rcf at room temperature for 10 minutes and the pellet  
19 was resuspended in 500 µL sorting buffer (1x PBS supplemented with 1% FBS). The  
20 concentration of the cell suspension was adjusted to 10<sup>7</sup> cells/mL and samples were stored  
21 on ice. Prior to staining, samples were incubated with Human TruStain FcX (Biolegend  
22 #422301) at 4°C for 10 minutes. The samples were subsequently incubated at 4°C for 30  
23 minutes with the following antibodies CD3-PerCP (Biolegend #344814), CD45-Pacific blue  
24 (Biolegend #304029), CD34-APC (BD biosciences #555824). Cells were subsequently  
25 washed and resuspended in sorting buffer. The final volume of the samples was adjusted to  
26 obtain a concentration of 1 - 10x10<sup>6</sup> cells /mL. Cells were stained using the following  
27 antibodies: cells were stained with Caspase 3-FITC (Sartorius, #4440) prior to the sorting.  
28 Cells were collected in FACS tubes coated with 10% FBS and collection buffer with 1x PBS  
29 and 0.04% RNase-free BSA (Invitrogen #AM2616).

30 **scRNA-seq: library preparation & sequencing**

31 Single cells per group across donors were pooled and then used as an input to 10X Genomics  
32 single-cell 3' Gene Expression v3 assay. Libraries were prepared based on manufacturer's  
33 instructions. Sequencing was performed using Illumina NextSeq 500.

34 **scRNA-seq: preprocessing and quality control**

35 Reads were aligned to the GRCh38 reference genome and quantified using cellranger count  
36 (10x Genomics, v.3.0.1). The expression data across cells were corrected for ambient RNA  
37 using soupX<sup>1</sup>. For the downstream analysis we used Seurat v3<sup>2</sup>. Cells with less than 200  
38 genes detected and more than 15% mitochondrial genes per cell were filtered out.

39 **scRNA-seq: normalization and downstream analysis**

40 After quality control and prior to dimensionality reduction, the data were normalized using  
41 SCTransform<sup>3</sup>, while regressing out the percentage of mitochondrial reads per cell. We first

42 performed dimensionality reduction using principal component analysis (PCA) on the 3000  
43 most variable features. Ribosomal, mitochondrial, sex chromosome genes and transcripts  
44 were excluded from the variable features. Uniform manifold approximation and projection  
45 (UMAP) was carried out on the first 50 principal components. Cells were then grouped into  
46 clusters using the Louvain algorithm. For defining the resolution (1.5) in FindClusters we used  
47 Clustree<sup>4</sup>. Marker genes across the different cell types were identified using Seurat's  
48 FindMarkers function on the RNA data slot. Genes considered were detected in at least 50%  
49 of cells per cluster (min.pct=0.5). Expression data were imputed using the MAGIC algorithm<sup>5</sup>.  
50 Seurat's LabelTransfer analysis was used in order to integrate our in-house scRNA-seq  
51 dataset with publicly available PBMCs CITE-seq data<sup>2</sup>.

## 52 Donor demultiplexing and sex identification

53 Demultiplexing of single cells based on genotypes in order to distinguish donors was  
54 performed using souporcell with  $k = 6^6$ . In the scRNA-seq data, the sex of the individuals was  
55 defined based on XIST (female) and RPS4Y1 (male) expression (Supplemental Figure 3).

## 56 Enrichment analysis of cell types across conditions

57 Per sorted population (CD3<sup>+</sup> gate), the enrichment of each cluster was estimated as the odds  
58 ratio (OR). P-values were calculated using Fisher's exact test and adjusted for multiple  
59 comparisons using the Bonferroni correction method. Per condition, a cluster was considered  
60 enriched when  $\log_2(\text{OR})$  was greater than 0 and with a  $p.\text{adj} < 0.05$ . To ensure that this OR  
61 was not driven by an individual patient, we additionally performed an enrichment analysis for  
62 each donor separately, testing the enrichment for each donor against all donors from the other  
63 group. For clusters where the donor-specific and the overall analysis agreed in terms of  
64 directionality, the p-value for a Fisher's exact test, adjusted for multiple testing with Bonferroni  
65 correction, was reported from the overall analysis. For clusters where the donor-specific  
66 analysis did not agree with the overall analysis, n.s. was reported independently of the p-value  
67 from the overall analysis.

## 68 Transcription factor activity analysis

69 The pySCENIC workflow<sup>7</sup> was run using an in-house constructed Snakemake pipeline. For  
70 gene regulatory network (GRN) inference, we used the GRNBoost2 algorithm from the  
71 Arboreto package<sup>8</sup>. SCENIC analysis was performed on the raw scRNA-Seq data. For  
72 predicting the transcription factor (TF) regulons, we used human v9 motif collection,  
73 hg38\_refseq-r80\_\_10kb\_up\_and\_down\_tss.mc9nr.feather and hg38\_refseq-  
74 r80\_\_500bp\_up\_and\_100bp\_down\_tss.mc9nr.feather databases from cisTarget  
75 (<https://resources.aertslab.org/cistarget/>). The output AUC scores per cell and GRN were  
76 used for visualization and downstream analysis. Assignment of target genes to known  
77 functions was performed using publicly available gene sets (IFN:  
78 HALLMARK\_INTERFERON\_GAMMA\_RESPONSE,  
79 HALLMARK\_INTERFERON\_ALPHA\_RESPONSE; Activation: Gene ontology, cell activation  
80 involved in immune response and regulation of immune effector process, TNF:  
81 HALLMARK\_TNFA\_SIGNALING\_VIA\_NFKB).

## 82 Differential expression and transcription factor activity analysis

83 For differential expression analysis between conditions we used FindMarkers function on the  
84 RNA slot with the method MAST, an algorithm suitable for scRNA-seq differential expression  
85 analysis<sup>9</sup>; we identified differentially expressed genes in the 2 T cell populations: CD4<sup>+</sup> and  
86 CD8<sup>+</sup> ( $p.\text{adj} < 0.05$  &  $\log_2\text{FC} > 0.5$ ). In order to identify differentially active transcription factors

87 (TFs) we used the SCENIC output to reconstruct a GRN and infer TF activity. To detect the  
88 enrichment of TFs for therapy response genes we used Fisher's exact test ( $\text{fdr} < 0.05$ ).  
89 Functional analysis of differentially expressed genes was performed using ClusterProfiler<sup>10</sup>  
90 (Gene ontology enrichment analysis using enrichGO function; KEGG pathway analysis using  
91 compareCluster function), msigdb<sup>11,12</sup> (Hallmark collection using enricher function) and  
92 ReactomePA<sup>13</sup> (pathway annotation using enrichPathway function). The background gene-set  
93 was defined as all the genes expressed in the dataset. P values were adjusted using  
94 Benjamini-Hochberg and the cutoff was set to 0.05.

### 95 **Trajectory analysis**

96 We calculated the pseudotime of the CD8<sup>+</sup> T cells (CD8<sup>+</sup> NV, CD8<sup>+</sup> eff. 1 and 2, CD8<sup>+</sup> mem.  
97 1, 2 and 3) using Monocle3<sup>14</sup>, on the SCT assay. Prior to pseudotime analysis, single cells  
98 across patients were aligned using align\_cds. The function learn\_graph was run with the  
99 use\_partition argument set to True. CD8<sup>+</sup> NV cells were set as the starting point. Diffusion  
100 maps<sup>15</sup> were computed on the SCT assay using PAGA<sup>16</sup>.

### 101 **Flow Cytometry analysis**

102 Bone marrow or peripheral blood samples were lysed in red blood cell lysis solution (0.15 M  
103 ammonium chloride, 10 mM potassium bicarbonate and 0.1 mM EDTA, diluted in sterile  
104 neutral pH water with a final pH between 7.2 and 7.8) at room temperature for 10 minutes.  
105 Subsequently, samples were centrifuged at 250 rcf for 5 minutes and the pellet was washed  
106 with 1x PBS (Gibco #14200). Staining was performed in 50-100  $\mu\text{L}$  cell suspension for 15  
107 minutes at room temperature in the dark. After staining, the pellet was washed with 1x PBS  
108 and resuspended in 100-200  $\mu\text{L}$  PBS.

109 Cells were stained using the following antibodies: CD45-Pacific blue (Biolegend #304029),  
110 GPR56-PE (Biolegend #358204), CD34-APC (BD biosciences #555824), CD45RA-PECy7  
111 (Biolegend # 304126), CD3-FITC (BD biosciences #555916), CD8-APC (BD biosciences  
112 #555369), CD33-PECy5 (BD biosciences #551377), CD4-APCH7 (BD biosciences #560158),  
113 CD56-PECy7 (Biolegend #362509), CD27-BV510 (Biolegend #302835), CCR7-Pacific blue  
114 (Biolegend #353210), CD62L-BV510 (Biolegend #304843) and CD3-PerCP (Biolegend  
115 #344814), CD107a-PE- Cy7 (Biolegend #328618), PD-1-APC (Biolegend #329908), CD69-  
116 PerCP (Biolegend #310928), CD44-FITC (Biolegend #163606). PBMCs activation was  
117 performed using phorbol myristate acetate (PMA; SigmaAldrich, #P8139-1MG) and ionomycin  
118 for 4h (SigmaAldrich, #I0634-1MG) according to the manufacturer's instructions.

### 119 **Intracellular flow cytometry analysis**

120 For the intracellular analysis of GZMB and PRF1, PBMCs of 10 AML patients post allo-HCT  
121 were used. Unless stated otherwise, after each step samples were washed with FACS buffer  
122 (1x PBS supplemented with 2% FBS; 1200rpm/5min/RT). After thawing, cells were incubated  
123 for 15 minutes at room temperature with Zombie yellow (Zombie Yellow: Biolegend, #423103)  
124 according to the manufacturer's protocol, followed by a 15 minute staining at room  
125 temperature with cell surface antibodies (GPR56-PE, Biolegend #358204; CD3-BUV750, BD  
126 Biosciences #747058; CD8-BUV395, BD Biosciences #563795). Cells were then  
127 permeabilized using BD Permeabilizing solution 2 (BD Biosciences #340973) for 10 minutes  
128 at room temperature and then washed with FACS buffer (1000 g/5 minutes/room  
129 temperature). Finally, samples were stained for GZMB (GZMB-PE-Cy5, Biolegend, #372226)  
130 and PRF1 (PRF1-PacBlue, Biolegend, #353305) for 15 minutes at room temperature. Flow  
131 cytometry analysis was done on a FACSymphony cytometer.

132 **FACS data analysis**

133 Cell debris was gated out. Cell singlets were selected using FSC-A over FSC-H and were  
134 divided into lymphocytes (CD45<sup>high</sup>SSC<sup>low</sup>), monocytes (CD45<sup>high</sup>SSC<sup>int</sup>), granulocytes  
135 (CD45<sup>high/int</sup>SSC<sup>high</sup>) and blasts (CD45<sup>low/int</sup>SSC<sup>low/int</sup>). Within the lymphocytes, cells were  
136 divided into T cells (CD3<sup>+</sup>) and non-T cells (CD3 negative). T cells were subsequently divided  
137 into various populations based on the expression of CD4, CD8, CD27, GPR56. Non-T cells  
138 were subdivided into CD56<sup>-</sup> and CD56<sup>+</sup> populations. Within CD4<sup>+</sup>CD8<sup>-</sup> and CD4<sup>-</sup>CD8<sup>+</sup>  
139 populations, following populations were defined based on the expression level of CCR7 and  
140 CD45RA: naive T cells (CCR7<sup>+</sup>CD45RA<sup>+</sup>), central memory cells (CM, CCR7<sup>+</sup>CD45RA<sup>-</sup>),  
141 effector memory cells (EM, CCR7<sup>-</sup>CD45RA<sup>-</sup>) and effector memory with CD45RA expression  
142 (EMRA, CCR7<sup>-</sup>CD45RA<sup>+</sup>). When patients were sampled several times, we consistently used  
143 the latest available time point per patient per analyzed time interval.

144 **CAR-T cell experiments**

145 For the production of the CD33-specific 3G (28.4-1BB.CD3z) CAR retroviruses<sup>17</sup>, 293T cells  
146 were co-transfected with the specific retroviral packaging plasmid, PegPam 3 plasmid  
147 (containing gag-pol) and RDF plasmid (containing the envelope) followed by harvest of the  
148 generated retroviral supernatants. Cells were cultured with IL-7/IL-15 (R&D Systems,  
149 Minneapolis, MN, USA). CD33.CAR-T cells were harvested on day 14 of expansion and  
150 challenged with HL60 cells as part of a long-term co-culture assay. Non-transduced ATCs  
151 were used as negative controls.

152 CARTs or non-transduced T cells (NTCs) were co-cultured with leukemic HL60 cells in 96-  
153 well plates in the absence of exogenous cytokines. The ratio of effector cells to leukemia cells  
154 was fixed at 1:1 on day 0, with 2,5x10<sup>4</sup> cells of each kind per well. We harvested one well per  
155 condition every 5 days and calculated the total number of T-cells and HL60 cells by flow  
156 cytometry using CountBright beads (Invitrogen). The dead cell population was excluded by 7-  
157 AAD staining. HL60 cells were identified by ZsGreen expression. If HL60 cells were  
158 eliminated, T-cells were re-challenged with the same number of fresh HL60 cells that were  
159 initially used.

160 On days 5 and 10 of the co-culture experiment, each technical replicate was transferred to a  
161 larger well (48-well plate and 24-well plate, respectively) in order to accommodate the rapidly  
162 growing CAR-T population.

163 For the sorting experiment, CD33.CAR-T cells were harvested from co-cultures after the first  
164 challenge, sorted for CD8<sup>+</sup> and GPR56<sup>+/-</sup> and CD27<sup>+/-</sup> on a BD Aria II sorter. After a 24h rest-  
165 period the sorted fractions were re-exposed to HL60 cells. Cultures were assessed by flow  
166 cytometry at the end of the 5-day co-culture periods. HL60 CD33 KO cells were generated as  
167 described<sup>17</sup>. HL-60 (#ACC 3) were purchased from Leibniz Institute DSMZ-German Collection  
168 of Microorganisms and Cell Cultures, Braunschweig, Germany.

169 **ELISpot assay**

170 CD8<sup>+</sup> T cells from healthy PBMC donors were sorted into a GPR56<sup>+</sup> and GPR56<sup>-</sup> fraction on  
171 a BD Aria II cell sorter (Becton Dickinson, Franklin Lakes, NJ). Immediately after sorting, the  
172 T cell populations were immersed in pre-warmed RPMI-1640 media supplemented with 10%  
173 HI-FBS and 10ng/ml IL-15 (PeproTech, Cat.: Nr. 200-15) to support their viability after sorting.  
174 The cells incubated overnight and thoroughly washed to remove traces of IL-15 prior to the  
175 start of co-culture in the next morning. The ELISPOT assay was performed in accordance with  
176 the manual provided by the manufacturer (MabTech, Cat.: Nr. 3420-4HPW-2). After unsealing,  
177 the ELISPOT 96-well plate was thoroughly washed with sterile PBS, then blocked with RPMI

178 1640 (Sigma-Aldrich #R8758) containing 10% FBS as was used during the co-culture. In the  
179 co-culture step, the medium was removed, and a mixture of effector and target cells was added  
180 to each well at a ratio of 1:4 (25,000 effector cells and 100,00 AML cells per well). Positive  
181 controls consisted of T cells only, stimulated with a monoclonal anti-CD3 antibody (1:1000  
182 dilution, mAb CD3-2). Negative controls consisted of effectors only, resuspended in complete  
183 medium without further additives. The plate was then placed in a 37°C incubator with 5% CO<sub>2</sub>  
184 for 24 hours. For the detection of the secreted IFN $\gamma$ , cells were removed, and the plate was  
185 washed 5 times with 1x PBS. The staining procedure included an incubation with a biotinylated  
186 primary anti-IFN $\gamma$  (mAb 1-D1K) monoclonal antibody, followed by a wash and a secondary  
187 Streptavidin-HRP conjugate. Finally, a TMB solution was added and left to react for 3 minutes  
188 at room temperature, as dark spots formed on the membrane. The color development was  
189 stopped by extensive washing in deionized water. The plate was then left to dry at room  
190 temperature in the dark. The spots were counted and the plate analyzed using an ELISPOT  
191 reader.

## 192 II. Supplemental Figure Legends

### 193 Supplemental Figure 1: FACS gating strategy for scRNA-seq analysis.

194 Gating strategy used to isolate CD3<sup>+</sup> T cells and CD34<sup>+</sup> HSPCs from bone marrow aspirates  
195 prior to 10x scRNA-seq.

### 196 Supplemental Figure 2: Quality control of single cell RNA-seq data.

197 (A, B) Number of genes relative to count depth colored by the fraction of mitochondrial reads  
198 (% of mito reads) prior quality control (QC; A) and post QC (B).

199 (C) Number of cells per sample.

200 (D) Number of genes per cell per sample.

201 (E) Number of unique molecular identifiers (UMIs) in a log<sub>2</sub> scale.

202 (F) Percentage of mitochondrial reads per cell.

### 203 Supplemental Figure 3: Sex annotation per donor, based on scRNA-seq data.

204 Violin plots showing the normalized expression of XIST (X linked gene, female) and RPS4Y1  
205 (Y chromosome gene, male) per patient sample.

### 206 Supplemental Figure 4: Patient representation of identified populations.

207 (A) UMAP representing 4 major identified populations.

208 (B) Barplots indicating the fractions of the different populations per patient sample.

209 (C) Sample representation per cell type/state within the CD34<sup>+</sup> subsets (log<sub>10</sub>-scale).

210 (D) Sample representation per cell type/state within the T cell subsets (log<sub>10</sub>-scale).

211 (E) (Top) Differential abundance analysis per cell type/state within the CD3<sup>+</sup> T-cells using  
212 Fisher's exact test (same as Figure 2C for easier comparison). The bars represent the log<sub>2</sub>  
213 odds ratios of CR vs REL samples. (Bottom) Differential abundance analysis per sample and  
214 cell type within the CD3<sup>+</sup> T cell compartments using Fisher's exact test. The colors represent  
215 the log<sub>2</sub> odds ratios of one sample (y-axis) vs all samples from the opposite condition (p-  
216 values were adjusted for multiple comparisons using the Bonferroni correction method), n.s.:  
217 not significant, \*P < 0.05, \*\*P < 0.001, \*\*\*P < 0.0001).

### 218 Supplemental Figure 5: Transcriptome levels across conventional CD8<sup>+</sup> cell 219 pseudotime.

220 (A) CD8<sup>+</sup> UMAP created using Monocle3. The different colors indicate the different clusters.

221 (B) UMAP colored by pseudotime as inferred from Monocle3. Gray points indicate the  
222 disconnected cells, computationally excluded from the pseudotime analysis.  
223 (C) Normalized expression of GZMK, NKG7, GNLY and GZMB projected on diffusion maps  
224 and split per condition.

225 **Supplemental Figure 6: Differential expression analysis in CD8<sup>+</sup> and CD4<sup>+</sup> T cells.**

226 (A) Volcano plot illustrating the differentially expressed genes between CR and REL samples  
227 after selecting all CD8<sup>+</sup> subsets. Horizontal dotted lines represent adjusted p value = 0.05  
228 (after Bonferroni correction) and vertical dotted lines represent absolute log<sub>2</sub>FC > 1.  
229 (B) Volcano plot illustrating the differentially expressed genes between CR and REL after  
230 selecting all CD4<sup>+</sup> clusters. Horizontal dotted lines represent adjusted p value = 0.05 (after  
231 Bonferroni correction) and vertical dotted lines represent absolute log<sub>2</sub>FC > 1.  
232 (C) Upset plot indicating the overlap of DEGs between the 2 populations (absolute log<sub>2</sub>FC >  
233 1, p.adj < 0.05 after Bonferroni correction).

234 **Supplemental Figure 7: SCENIC workflow for extracting differentially active TFs.**

235 (A) Method overview.  
236 (B) Upset plot indicating the overlap of the differentially active transcription factors (TFs)  
237 between the 3 major populations.  
238 (C, D) Bar graphs depicting the log<sub>2</sub>OR per TF in CD8 (C) and CD4 (D) cells calculated with  
239 Fisher's test according to the workflow outlined in A. Green color indicates FDR < 0.05.

240 **Supplemental Figure 8: Characterization of regulons across TFs in the 3 major cell  
241 subsets.**

242 (A) Upset plot indicating the overlap of target genes across the significantly differentially active  
243 TFs.  
244 (B) Venn diagrams representing the overlap of target genes between CD4<sup>+</sup> and CD8<sup>+</sup> cells for  
245 MAFF, JUNB, CREM.

246 **Supplemental Figure 9: Gene expression changes in MAIT cells and naive CD8<sup>+</sup> cells.**

247 (A, B) Volcano plots illustrating the differentially expressed genes between CR and REL CD8<sup>+</sup>  
248 NV (A) and MAIT (B) cells. Horizontal dotted lines represent adjusted p value = 0.05 (after  
249 Bonferroni correction) and vertical dotted lines represent absolute log<sub>2</sub>FC > 0.5.

250 **Supplemental Figure 10: GPR56 and CD27 expression along the CD8<sup>+</sup> T cells trajectory.**

251 (A) Density plot indicating the distribution of the normalized expression of *ADGRG1/GPR56*  
252 and *CD27* within the CD8<sup>+</sup> effector memory (EM) cells. Vertical red line indicates the threshold  
253 (0.5) used for defining a cell as GPR56<sup>+</sup> and CD27<sup>+</sup> cells for Figure 3.  
254 (B) Scaled expression across pseudotime of *GPR56*, *CD27* and other CD8<sup>+</sup> markers.  
255 (C) Diffusion maps for the CD8<sup>+</sup> cells colored by normalized expression of *CD27*, *GPR56* and  
256 *ZNF683* and split per condition.  
257 (D) Violin plot depicting the MAGIC imputed expression of *ADGRG1/GPR56* on CD4<sup>+</sup> T cells  
258 and CD8<sup>+</sup> T subsets, split per condition.  
259 (E) Waterfall plot depicting Pearson correlation analysis of *GPR56* expression with other  
260 genes in CD8<sup>+</sup> TEM cells. The x-axis represents the top 50 correlating genes, while the y-axis  
261 shows the Pearson correlation coefficient values. The color-coded scheme distinguishes  
262 between positive and negative correlations, with purple bars indicating positive correlations  
263 while the orange bars denote negative correlations.

264 (F) Gene ontology enrichment analysis performed on differentially expressed genes between  
265 GPR56<sup>+</sup> and GPR56<sup>-</sup> CD8<sup>+</sup> EM cells.

266 **Supplemental Figure 11: Gating scheme for intracellular staining.**

267 Representative scheme illustrating the FACS gating strategy used to separate GPR56<sup>+</sup> from  
268 GPR56<sup>-</sup> CD8<sup>+</sup> T cells. The two fractions were further analyzed for PRF1 and GZMB  
269 intracellular protein expression. Analysis was performed on PBMCs from a cohort of 10 AML  
270 patients in remission.

271 **Supplemental Figure 12: GPR56 is not redundant with T cell activation markers.**

272 (A, B) Representative FACS plots illustrating the gating strategy used to separate GPR56<sup>+</sup>  
273 and GPR56<sup>-</sup> fractions for further analysis of CD69 and CD44-(A) and PD-1 and CD107a (B) in  
274 the two fractions.

275 (C, D, E, F) Boxplots illustrating the comparison between the CD8<sup>+</sup> GPR56<sup>+</sup> (purple) and CD8<sup>+</sup>  
276 GPR56<sup>-</sup> (orange) fractions with regards to percentage of CD44<sup>+</sup>, CD107a<sup>+</sup>, PD-1<sup>+</sup> and CD69<sup>+</sup>  
277 fractions, respectively. Connected points indicate fractions originating from the same sample.  
278 P-value was calculated using a paired Wilcoxon test. Analysis was performed on PBMCs from  
279 a cohort of 10 AML patients in remission.

280 (G) CD69 and GPR56 profiles of unstimulated (left) PBMC-derived CD8<sup>+</sup> T cells as well as  
281 after stimulation with PMA and Ionomycin for 4h (right).

282 **Supplemental Figure 13: GPR56 expression on CAR-T cells.**

283 (A) Time course of the percentage of CD8<sup>+</sup>, CD4<sup>+</sup>, and CD15<sup>+</sup> HL60 cells of all viable cells in  
284 the cocultures. Cocultures were analyzed every 5 days followed by reexposure to fresh HL60  
285 cells.

286 (B) Representative FACS histogram plot showing the shift in GPR56 expression on CAR-T  
287 cells when exposed to HL60 cells.

288 (C) Boxplot depicting the percentage of GPR56<sup>+</sup> cells within healthy donor CD8<sup>+</sup> T cells,  
289 without any stimulation (non-activated), after stimulation with anti-CD3 antibody (anti-CD3)  
290 and after stimulation with anti-CD3/anti-CD28 antibodies (anti-CD3/anti-CD28). Cells were  
291 isolated from PBMCs of 4 healthy donors. Connected points represent samples originating  
292 from the same donor. Numbers indicate p-values calculated using paired Wilcoxon test.

293 (D) Distribution of the percentage of GPR56 and CD27 during the 5 serial challenges. Stacked  
294 bars represent the means of the four donors.

295 **Supplemental Figure 14: Gating strategy for flow cytometry analysis.**

296 (A) Schematic illustration of the sample work flow.

297 (B) Gating strategy for panels 1 and 2 as indicated. See supplemental methods for antibody  
298 details.

299 (C) Gating strategy for panel 3. After gating out debris and doublets, gates were set around  
300 putative lymphocytes, monocytes and granulocytes according to the typical FSC and SSC  
301 pattern. CD3<sup>+</sup> T cells were gated from the lymphocyte gate followed by gating for CD4 and  
302 CD8. CD8 cells were further analyzed using CCR7 and CD45RA to distinguish naive, central  
303 memory (T<sub>CM</sub>), effector memory (T<sub>EM</sub>) and CD45RA<sup>+</sup> effector memory (T<sub>EMRA</sub>) T cells.  
304 Subsequently, GPR56 positivity was calculated within each of these subsets.

305 **Supplemental Figure 15: Flow cytometry of patient bone marrow samples.**

306 (A) Box plot showing median, quartiles, and individual values of GPR56 expression in CD8<sup>+</sup>  
307 naive and central memory (CM) T cells as well as CD4<sup>+</sup> naive, CM, effector memory (EM) and

308 CD45RA<sup>+</sup> EM (EMRA) T cells in patients without (noAllo), before (preAllo), and after (postAllo)  
309 allo-HCT. Numbers below plots indicate sample size, values besides box plot indicate the  
310 median.

311 (B) Right panel: percentage of CD8<sup>+</sup> T<sub>EMRA</sub> in bone marrow (left) and percentage of GPR56<sup>+</sup>  
312 on CD8<sup>+</sup> T<sub>EMRA</sub> (right). Numbers below plots show the median percentage. Numbers between  
313 groups of patients without (noAllo), before (preAllo) and after (postAllo) allo-HCT indicate the  
314 adjusted p-values (unpaired Wilcoxon test).

315 (C) Box plot showing median, quartiles, and individual values of GPR56 expression in  
316 CD3<sup>+</sup>CD4<sup>-</sup>CD8<sup>-</sup> double negative T cells (left) and CD3<sup>+</sup>CD56<sup>+</sup> NK cells (right) in patients  
317 without (noAllo), before (preAllo), and after (postAllo) allo-HCT. Numbers below plots indicate  
318 sample size, values besides box plot indicate the median. Colored numbers above the plot  
319 indicate sample numbers.

320 (D) Time course of GPR56 expression on double negative CD3<sup>+</sup>CD4<sup>-</sup>CD8<sup>-</sup> T cells (top) and  
321 NK cells (bottom). Box plots show medians, quartiles, outliers. Numbers above boxes indicate  
322 the medians. Colored numbers above the plot indicate sample numbers.

323 (E) Time course of GPR56 expression on CD4<sup>+</sup> T<sub>EMRA</sub> (upper) and CD3<sup>-</sup>CD56<sup>+</sup> NK cells (lower)  
324 in CMV negative (left) and positive (right) recipients. Box plots show medians, quartiles,  
325 outliers. Numbers above boxes indicate the medians.

### 326 **Supplemental Figure 16: Time course analysis of patient bone marrow samples.**

327 (A) Time course for the percentage of GPR56<sup>+</sup>CD27<sup>-</sup> of CD8<sup>+</sup> (violet), GPR56<sup>+</sup>CD27<sup>+</sup> of CD8<sup>+</sup>  
328 (blue), GPR56 of T<sub>EM</sub> (dark green), and GPR56 of T<sub>EMRA</sub> (light green) for patient GXW009,  
329 GXW097, GXW023, and GXW147. CMV status of patient ("R") and donor ("D"), as well as  
330 donor sex are indicated. Text below x-axis indicates clinical course of the disease: CR=  
331 complete remission, CRi= complete remission with incomplete recovery, IS= under  
332 immunosuppression. Chim= donor chimerism, G-CSF= granulocyte-colony stimulating factor.  
333 (B) Left four panels: Percentage of GPR56 in total CD8<sup>+</sup> compartment, CD8<sup>+</sup> T<sub>EMRA</sub>, CD4<sup>+</sup> and  
334 NK cells in patients sampled within the first six months post allo-HCT, who were in CR at  
335 sampling and either stayed in CR at last follow-up ("CR") or relapsed at last follow-up ("REL").  
336 Right: Interval between sampling time and allo-HCT in CR and REL group. Colors of dots  
337 represent CMV recipient status. Box plots showing median, quartiles, individual values. P-  
338 values estimated with Wilcoxon test.

### 339 **Supplemental Figure 17: ELISpot assays of post-allo-HCT PBMC derived T cells of CR** 340 **patients.**

341 (A) Gating strategy of PBMCs in order to obtain GPR56<sup>+</sup> (purple) and GPR56<sup>-</sup> (orange) CD8<sup>+</sup>  
342 fractions of T cells.

343 (B) Images of ELISpot data summarized in Figure 5I per patient.

344 (C) Images of ELISpot assay results for GPR56<sup>+</sup> and GPR56<sup>-</sup> CD8<sup>+</sup> T cells of PT6 co-cultured  
345 with non-matched primary AML blasts.

### 346 **III. Supplemental Table Legends**

347 Supplemental Table 1: Patient and sample characteristics.

348 Supplemental Table 2: Marker genes of scRNAseq data clusters.

349 Supplemental Table 3: Cluster abundances using Fisher's exact test.

350 Supplemental Table 4: Differentially expressed genes between CR and REL in CD8<sup>+</sup> and CD4<sup>+</sup>  
351 T cells.



352 Supplemental Table 5: SCENIC gene regulatory network.  
353 Supplemental Table 6: Differential TF activity analysis.  
354 Supplemental Table 7: Differentially expressed genes between CR and REL.  
355 Supplemental Table 8: Results from functional enrichment analysis of differentially expressed  
356 genes in CD8<sup>+</sup> EM cells.  
357 Supplemental Table 9: Differentially expressed genes between GPR56<sup>+</sup> and GPR56<sup>-</sup> in CD8<sup>+</sup>  
358 EM in CR.  
359 Supplemental Table 10: Results from functional enrichment analysis of differentially  
360 expressed genes between GPR56<sup>+</sup> and GPR56<sup>-</sup> CR CD8<sup>+</sup> EM cells.  
361 Supplemental Table 11: ELISpot results.

362  
363

## 364 Bibliography

- 365 1. Young MD, Behjati S. SoupX removes ambient RNA contamination from droplet-based  
366 single-cell RNA sequencing data. *Gigascience*. 2020;9(12):giaa151.
- 367 2. Hao Y, Hao S, Andersen-Nissen E, et al. Integrated analysis of multimodal single-cell  
368 data. *Cell*. 2021;184(13):3573-3587.
- 369 3. Hafemeister C, Satija R. Normalization and variance stabilization of single-cell RNA-  
370 seq data using regularized negative binomial regression. *Genome Biol*. 2019;20(1):296.
- 371 4. Zappia L, Oshlack A. Clustering trees: a visualization for evaluating clusterings at  
372 multiple resolutions. *Gigascience*. 2018;7(7):giy083.
- 373 5. van Dijk D, Sharma R, Nainys J, et al. Recovering Gene Interactions from Single-Cell  
374 Data Using Data Diffusion. *Cell*. 2018;174(3):716-729.e27.
- 375 6. Heaton H, Talman AM, Knights A, et al. Souporecell: robust clustering of single-cell  
376 RNA-seq data by genotype without reference genotypes. *Nat. Methods*.  
377 2020;17(6):615–620.
- 378 7. Van de Sande B, Flerin C, Davie K, et al. A scalable SCENIC workflow for single-cell  
379 gene regulatory network analysis. *Nat. Protoc*. 2020;15(7):2247–2276.
- 380 8. Moerman T, Aibar Santos S, Bravo González-Blas C, et al. GRNBoost2 and Arboreto:  
381 efficient and scalable inference of gene regulatory networks. *Bioinformatics*.  
382 2019;35(12):2159–2161.
- 383 9. Finak G, McDavid A, Yajima M, et al. MAST: a flexible statistical framework for  
384 assessing transcriptional changes and characterizing heterogeneity in single-cell RNA  
385 sequencing data. *Genome Biol*. 2015;16:278.
- 386 10. Wu T, Hu E, Xu S, et al. clusterProfiler 4.0: A universal enrichment tool for interpreting  
387 omics data. *Innovation (Camb)*. 2021;2(3):100141.
- 388 11. Subramanian A, Tamayo P, Mootha VK, et al. Gene set enrichment analysis: a  
389 knowledge-based approach for interpreting genome-wide expression profiles. *Proc Natl  
390 Acad Sci USA*. 2005;102(43):15545–15550.

- 391 12. Liberzon A, Subramanian A, Pinchback R, et al. Molecular signatures database  
392 (MSigDB) 3.0. *Bioinformatics*. 2011;27(12):1739–1740.
- 393 13. Yu G, He Q-Y. ReactomePA: an R/Bioconductor package for reactome pathway  
394 analysis and visualization. *Mol. Biosyst.* 2016;12(2):477–479.
- 395 14. Trapnell C, Cacchiarelli D, Grimsby J, et al. The dynamics and regulators of cell fate  
396 decisions are revealed by pseudotemporal ordering of single cells. *Nat. Biotechnol.*  
397 2014;32(4):381–386.
- 398 15. Haghverdi L, Buettner F, Theis FJ. Diffusion maps for high-dimensional single-cell  
399 analysis of differentiation data. *Bioinformatics*. 2015;31(18):2989–2998.
- 400 16. Wolf FA, Hamey FK, Plass M, et al. PAGA: graph abstraction reconciles clustering with  
401 trajectory inference through a topology preserving map of single cells. *Genome Biol.*  
402 2019;20(1):59.
- 403 17. Liu Y, Wang S, Schubert M-L, et al. CD33-directed immunotherapy with third-  
404 generation chimeric antigen receptor T cells and gemtuzumab ozogamicin in intact and  
405 CD33-edited acute myeloid leukemia and hematopoietic stem and progenitor cells. *Int.*  
406 *J. Cancer*. 2022;150(7):1141–1155.

# Supplemental Figure 1

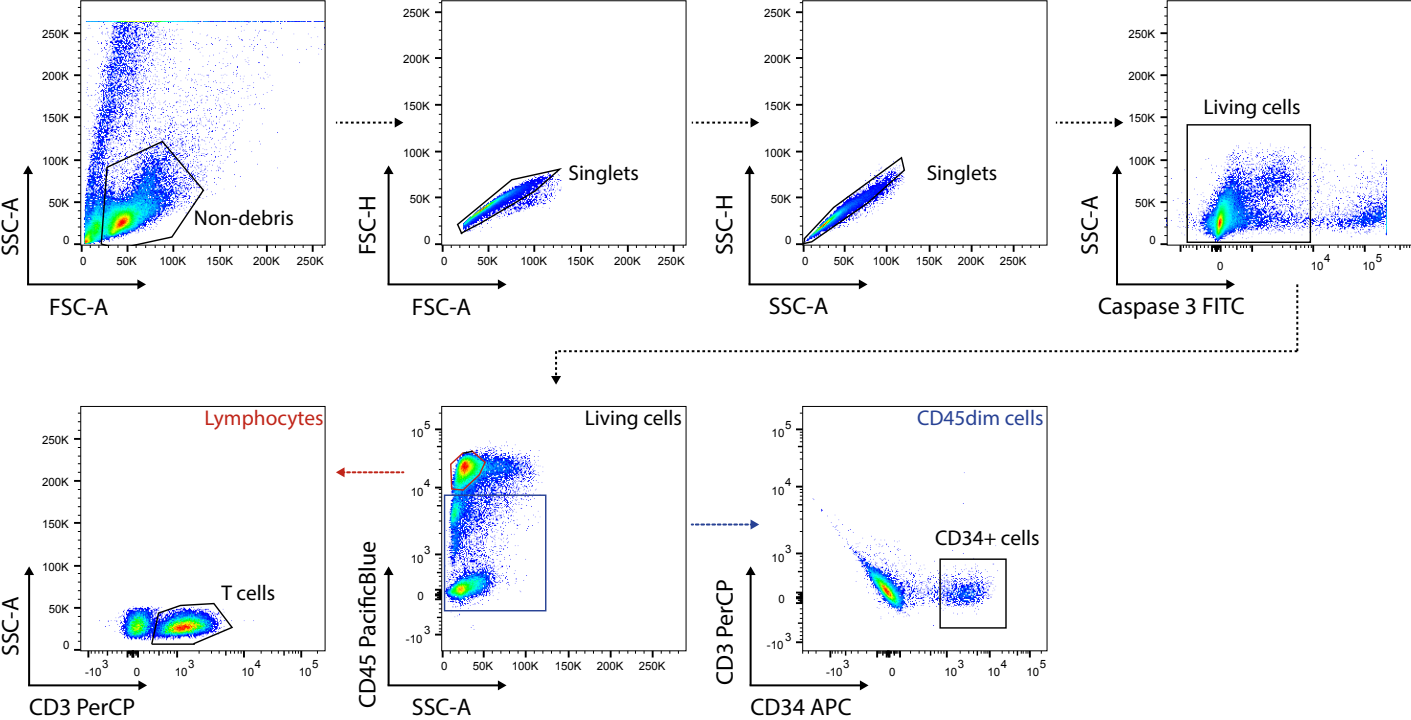

## Supplemental Figure 2

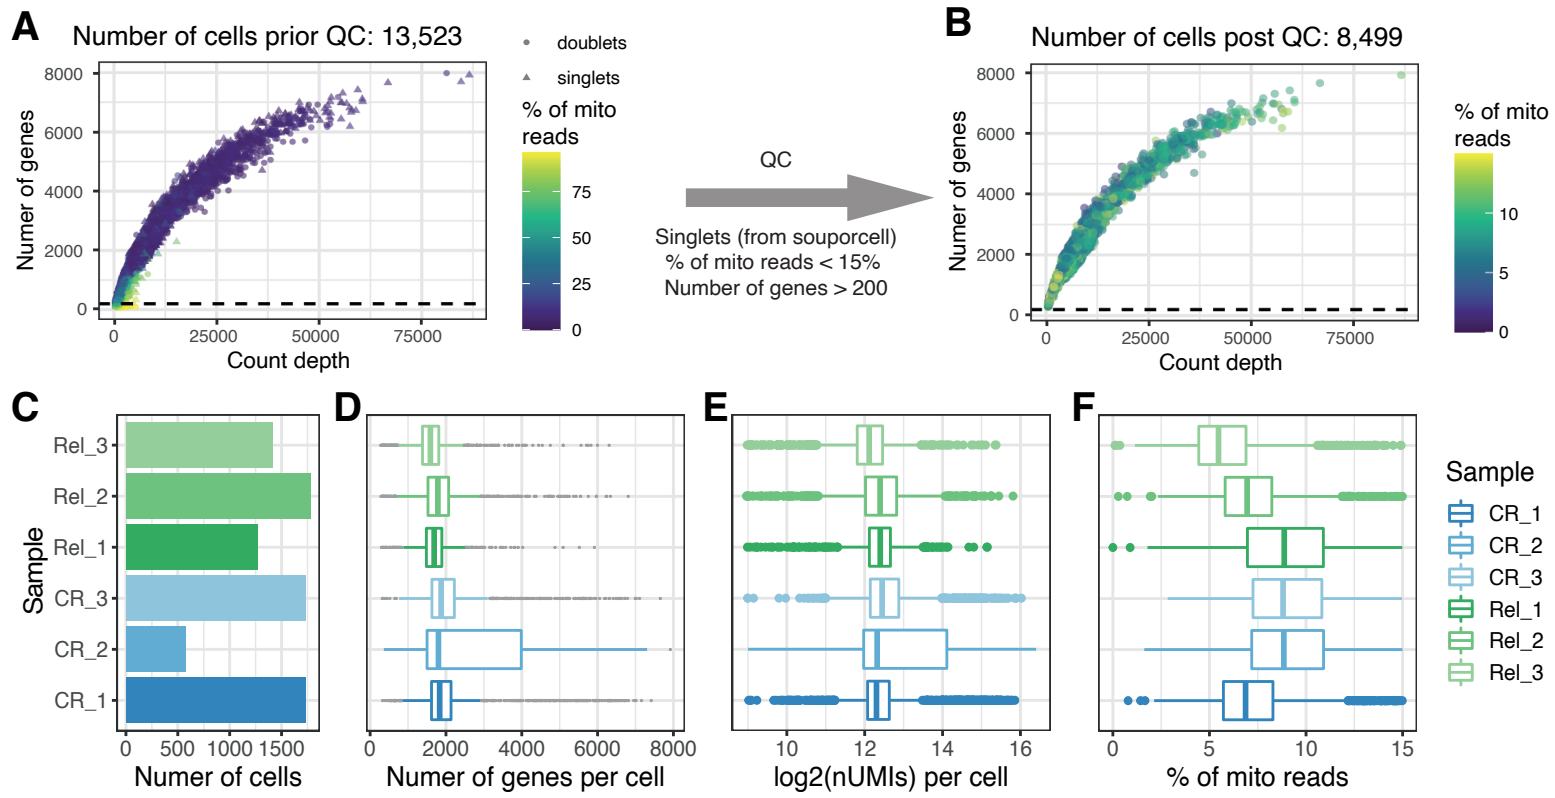

Supplemental Figure 3

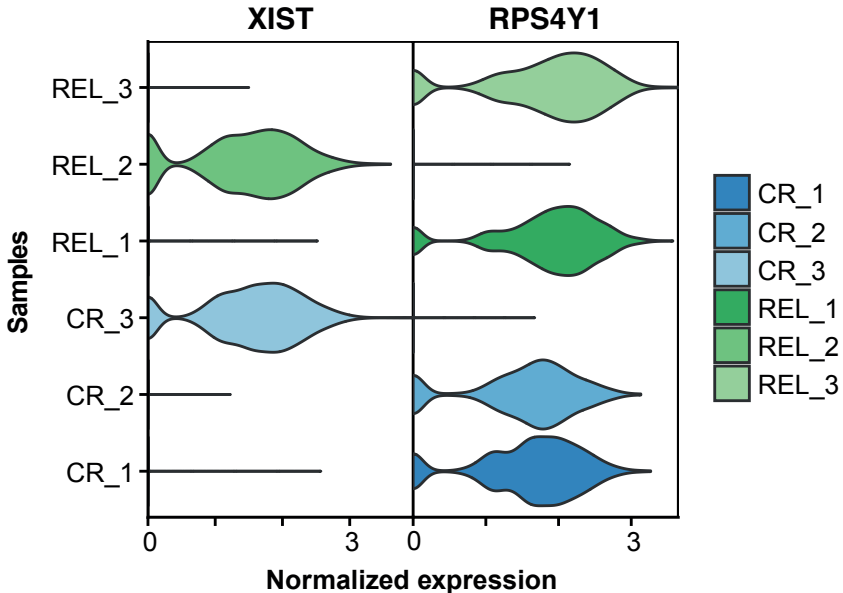

# Supplemental Figure 4

**A**

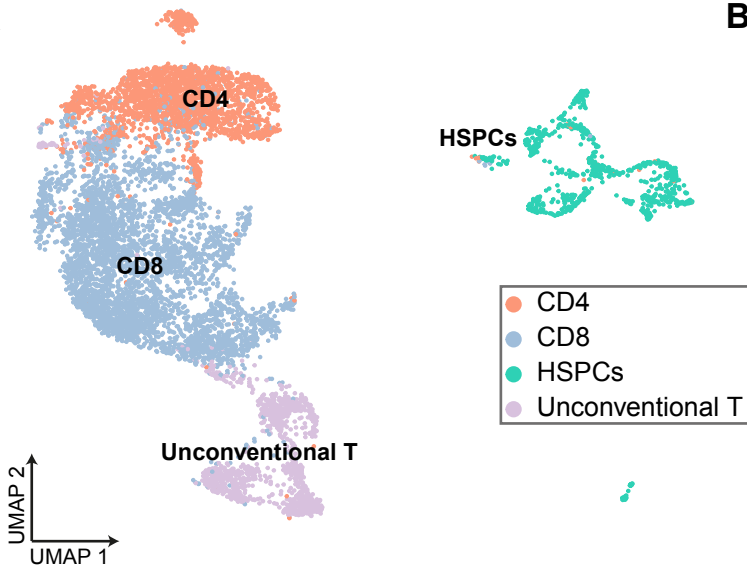

**B**

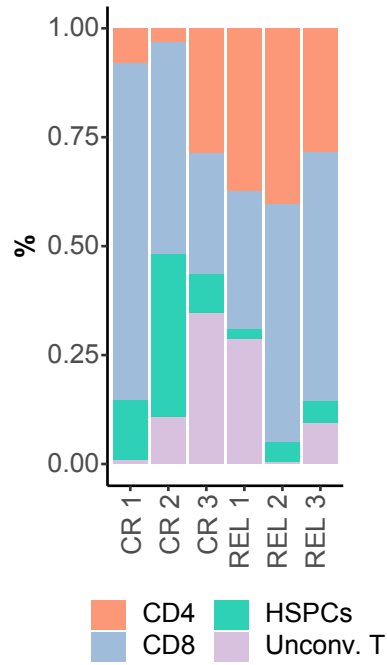

**C**

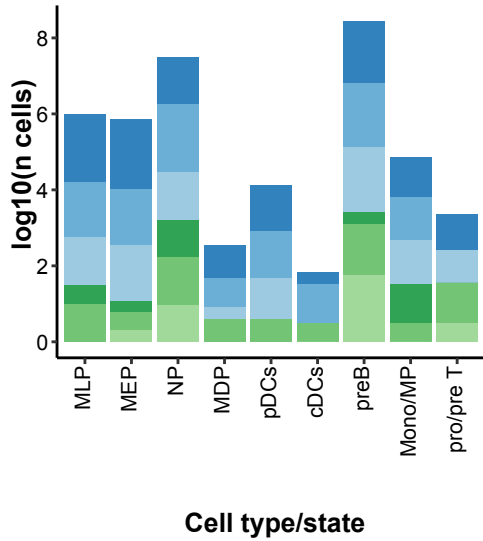

**D**

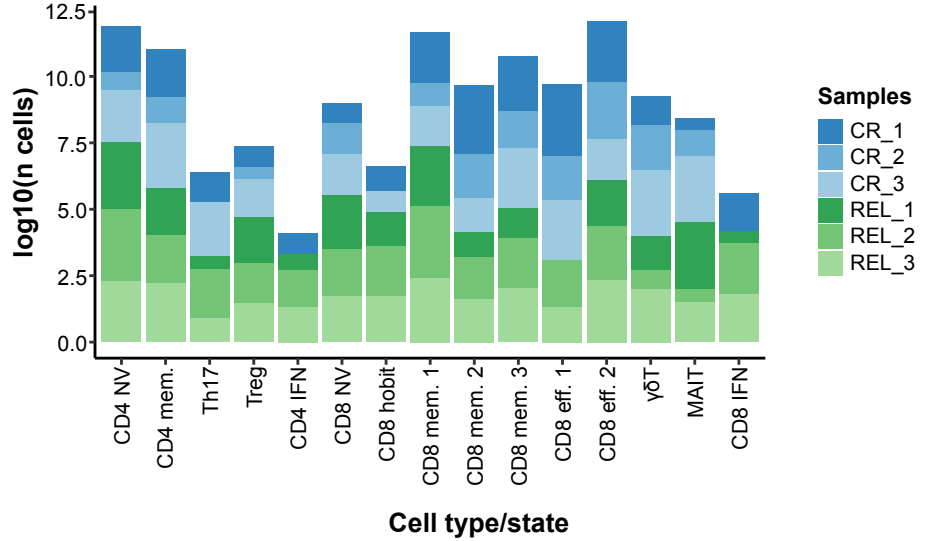

**E**

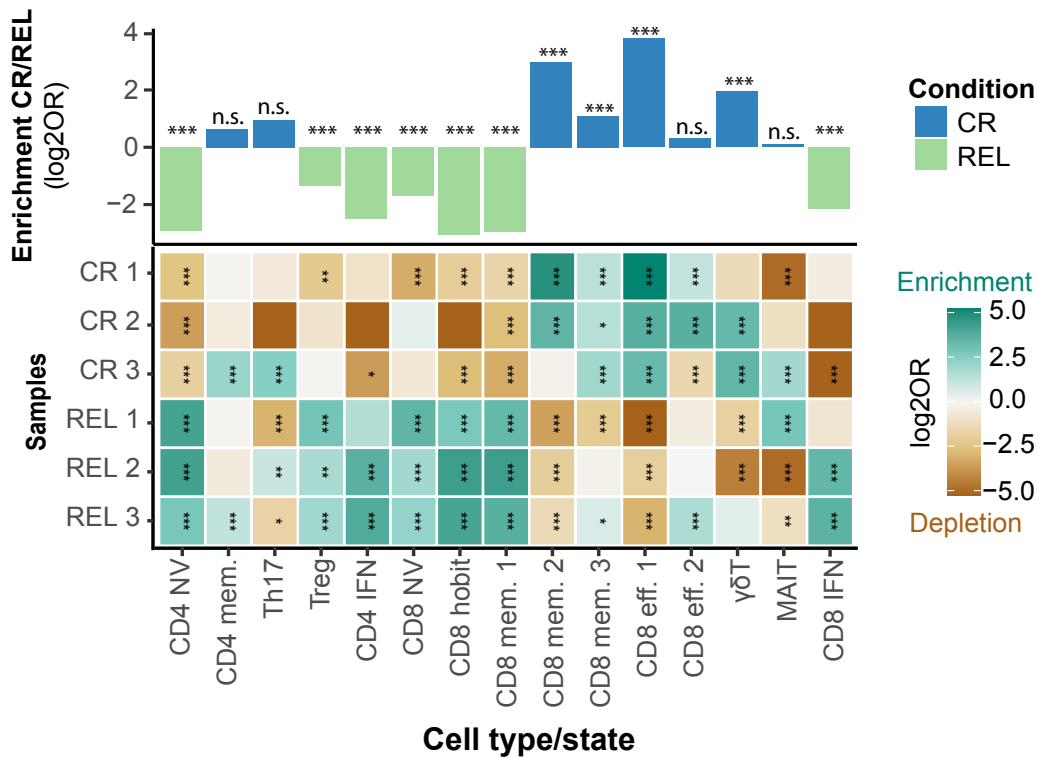

# Supplemental Figure 5

**A**

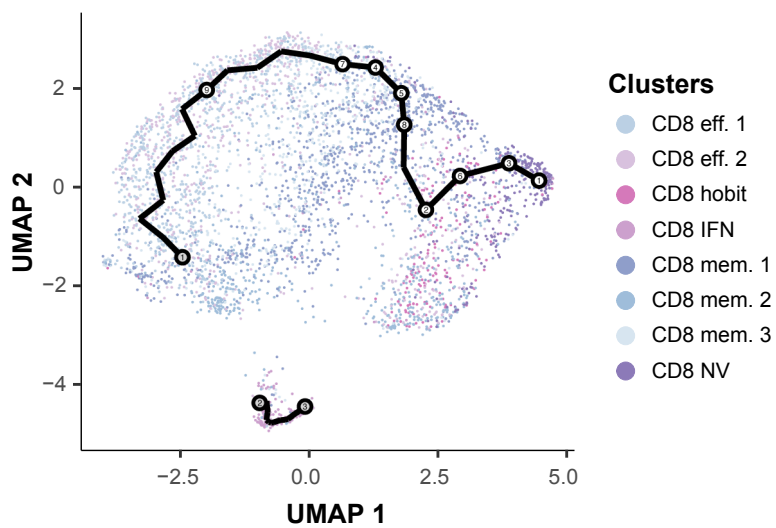

**B**

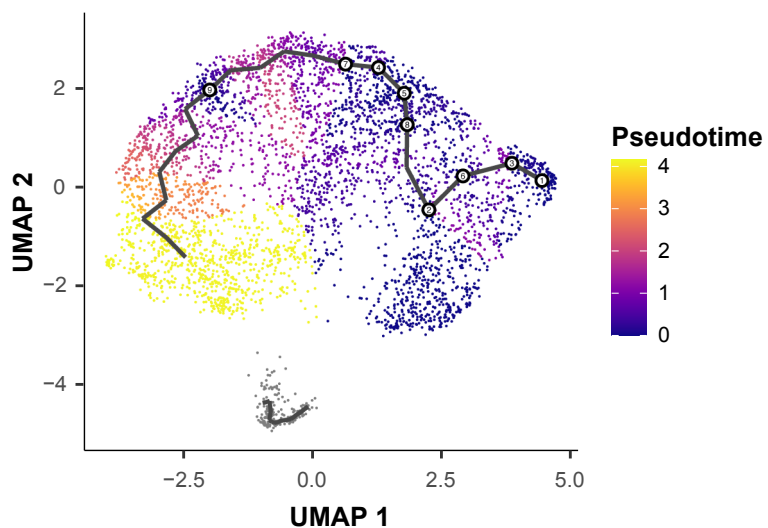

**C**

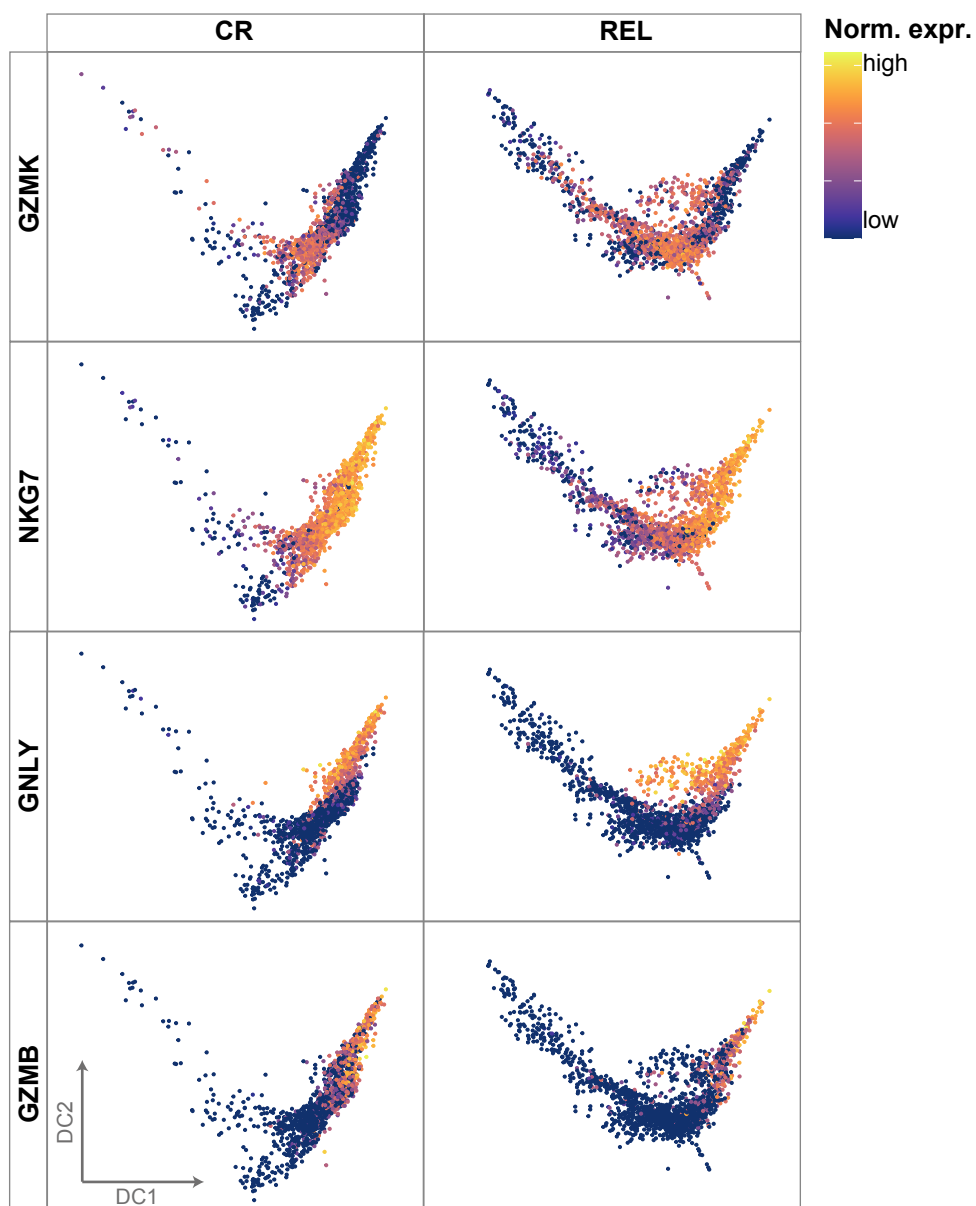

# Supplemental Figure 6

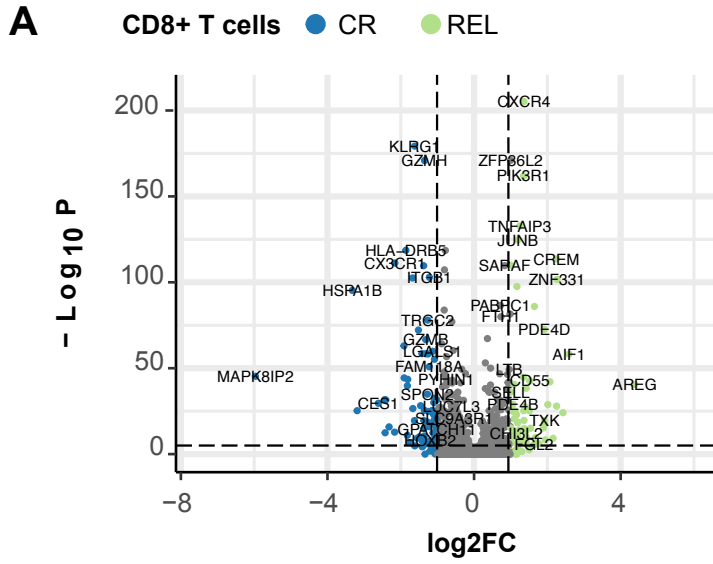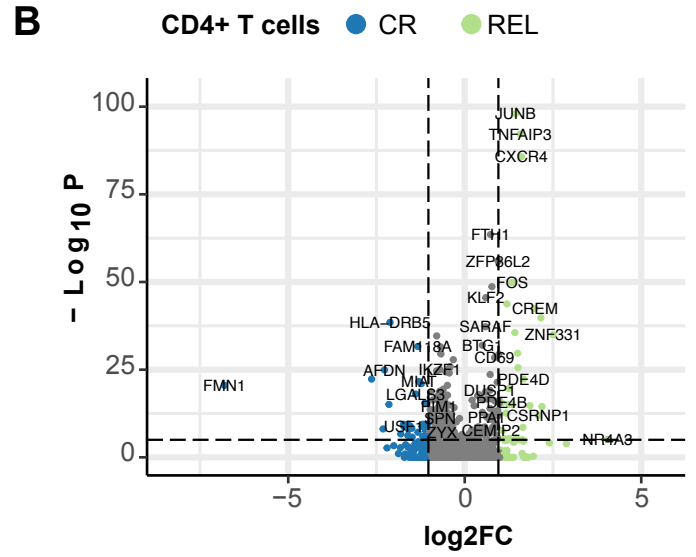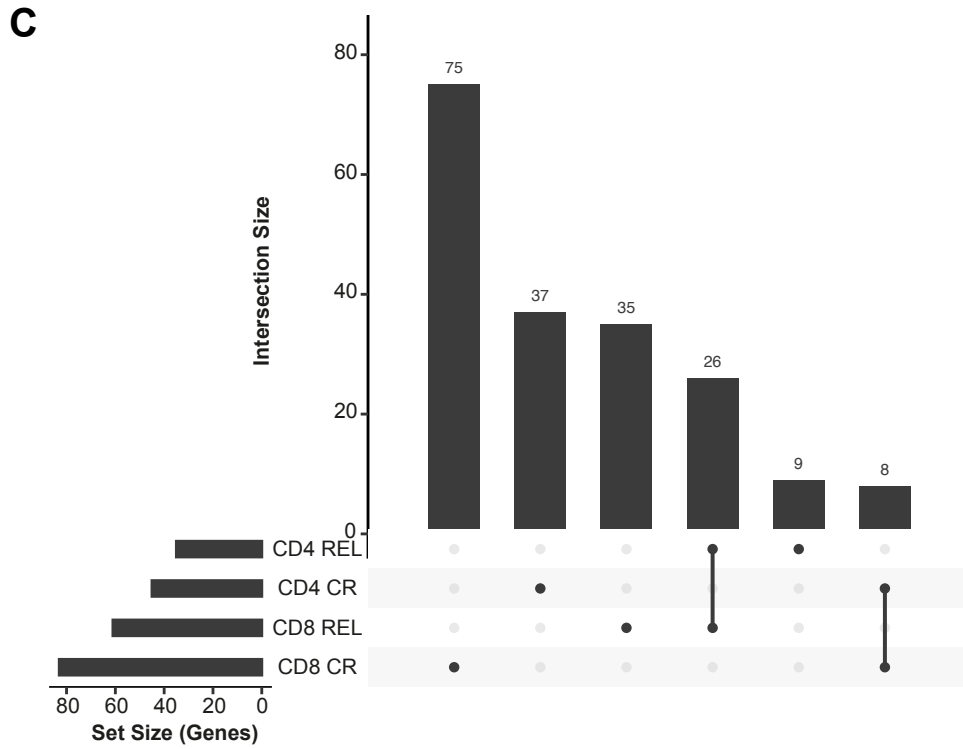



# Supplemental Figure 7

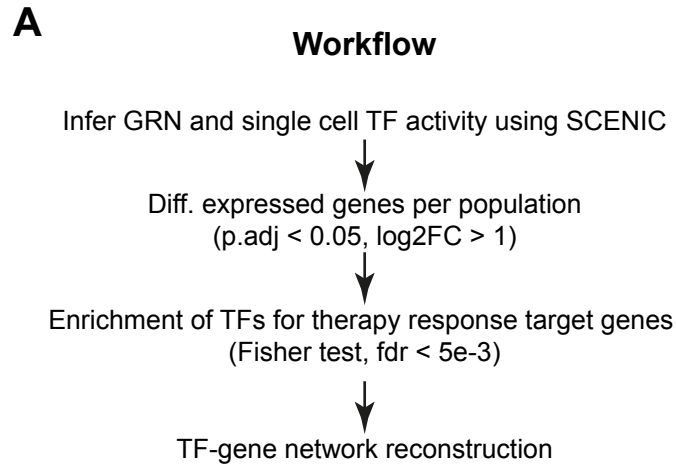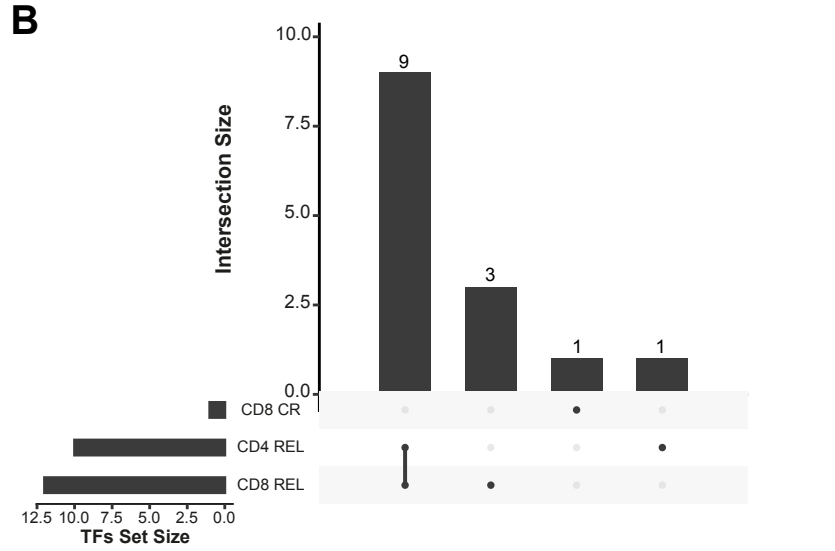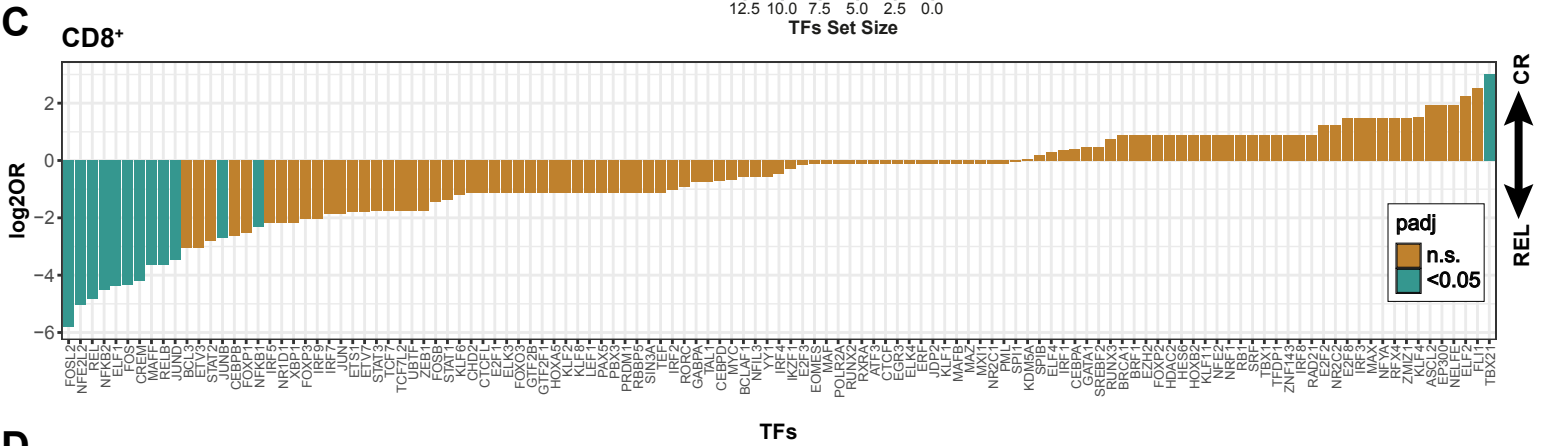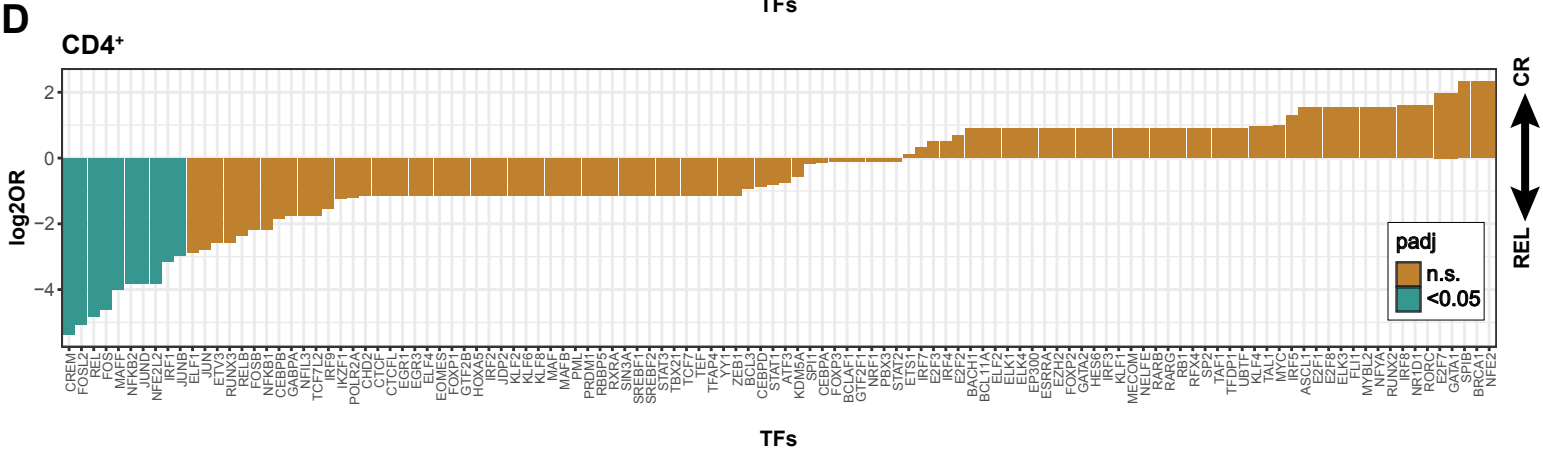



# Supplemental Figure 9

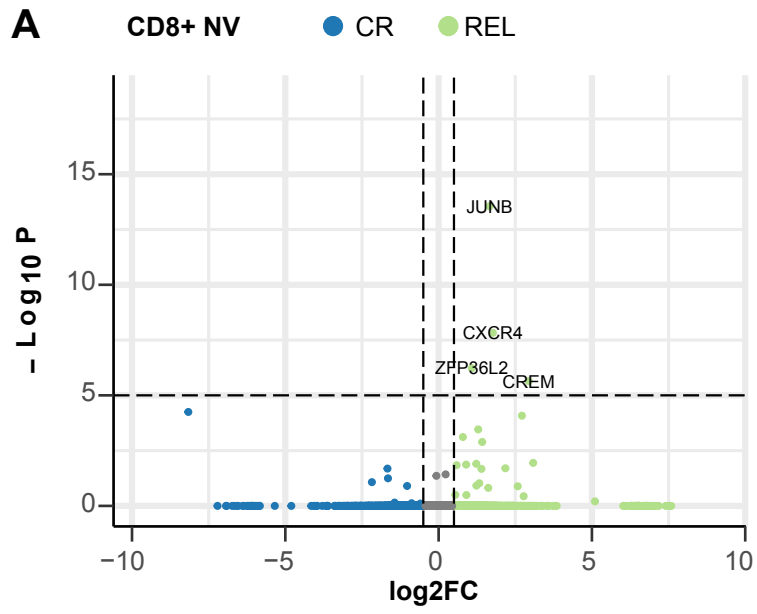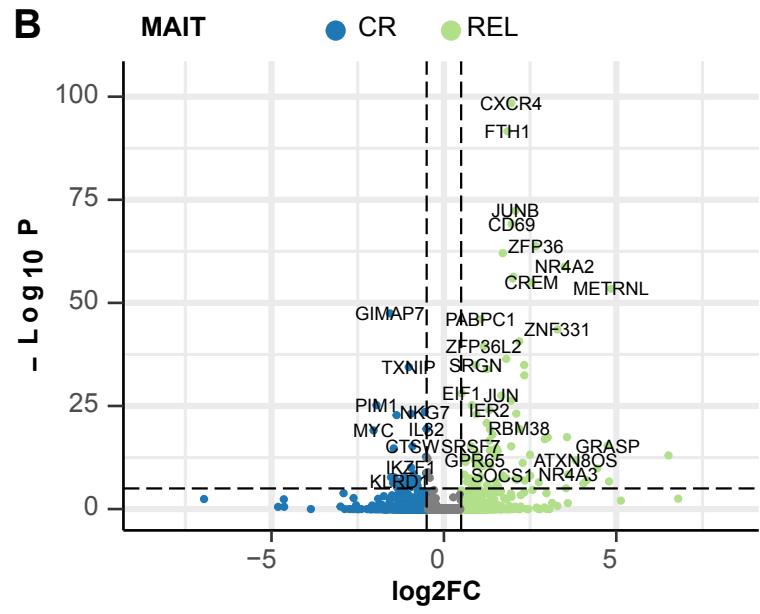

# Supplemental Figure 10

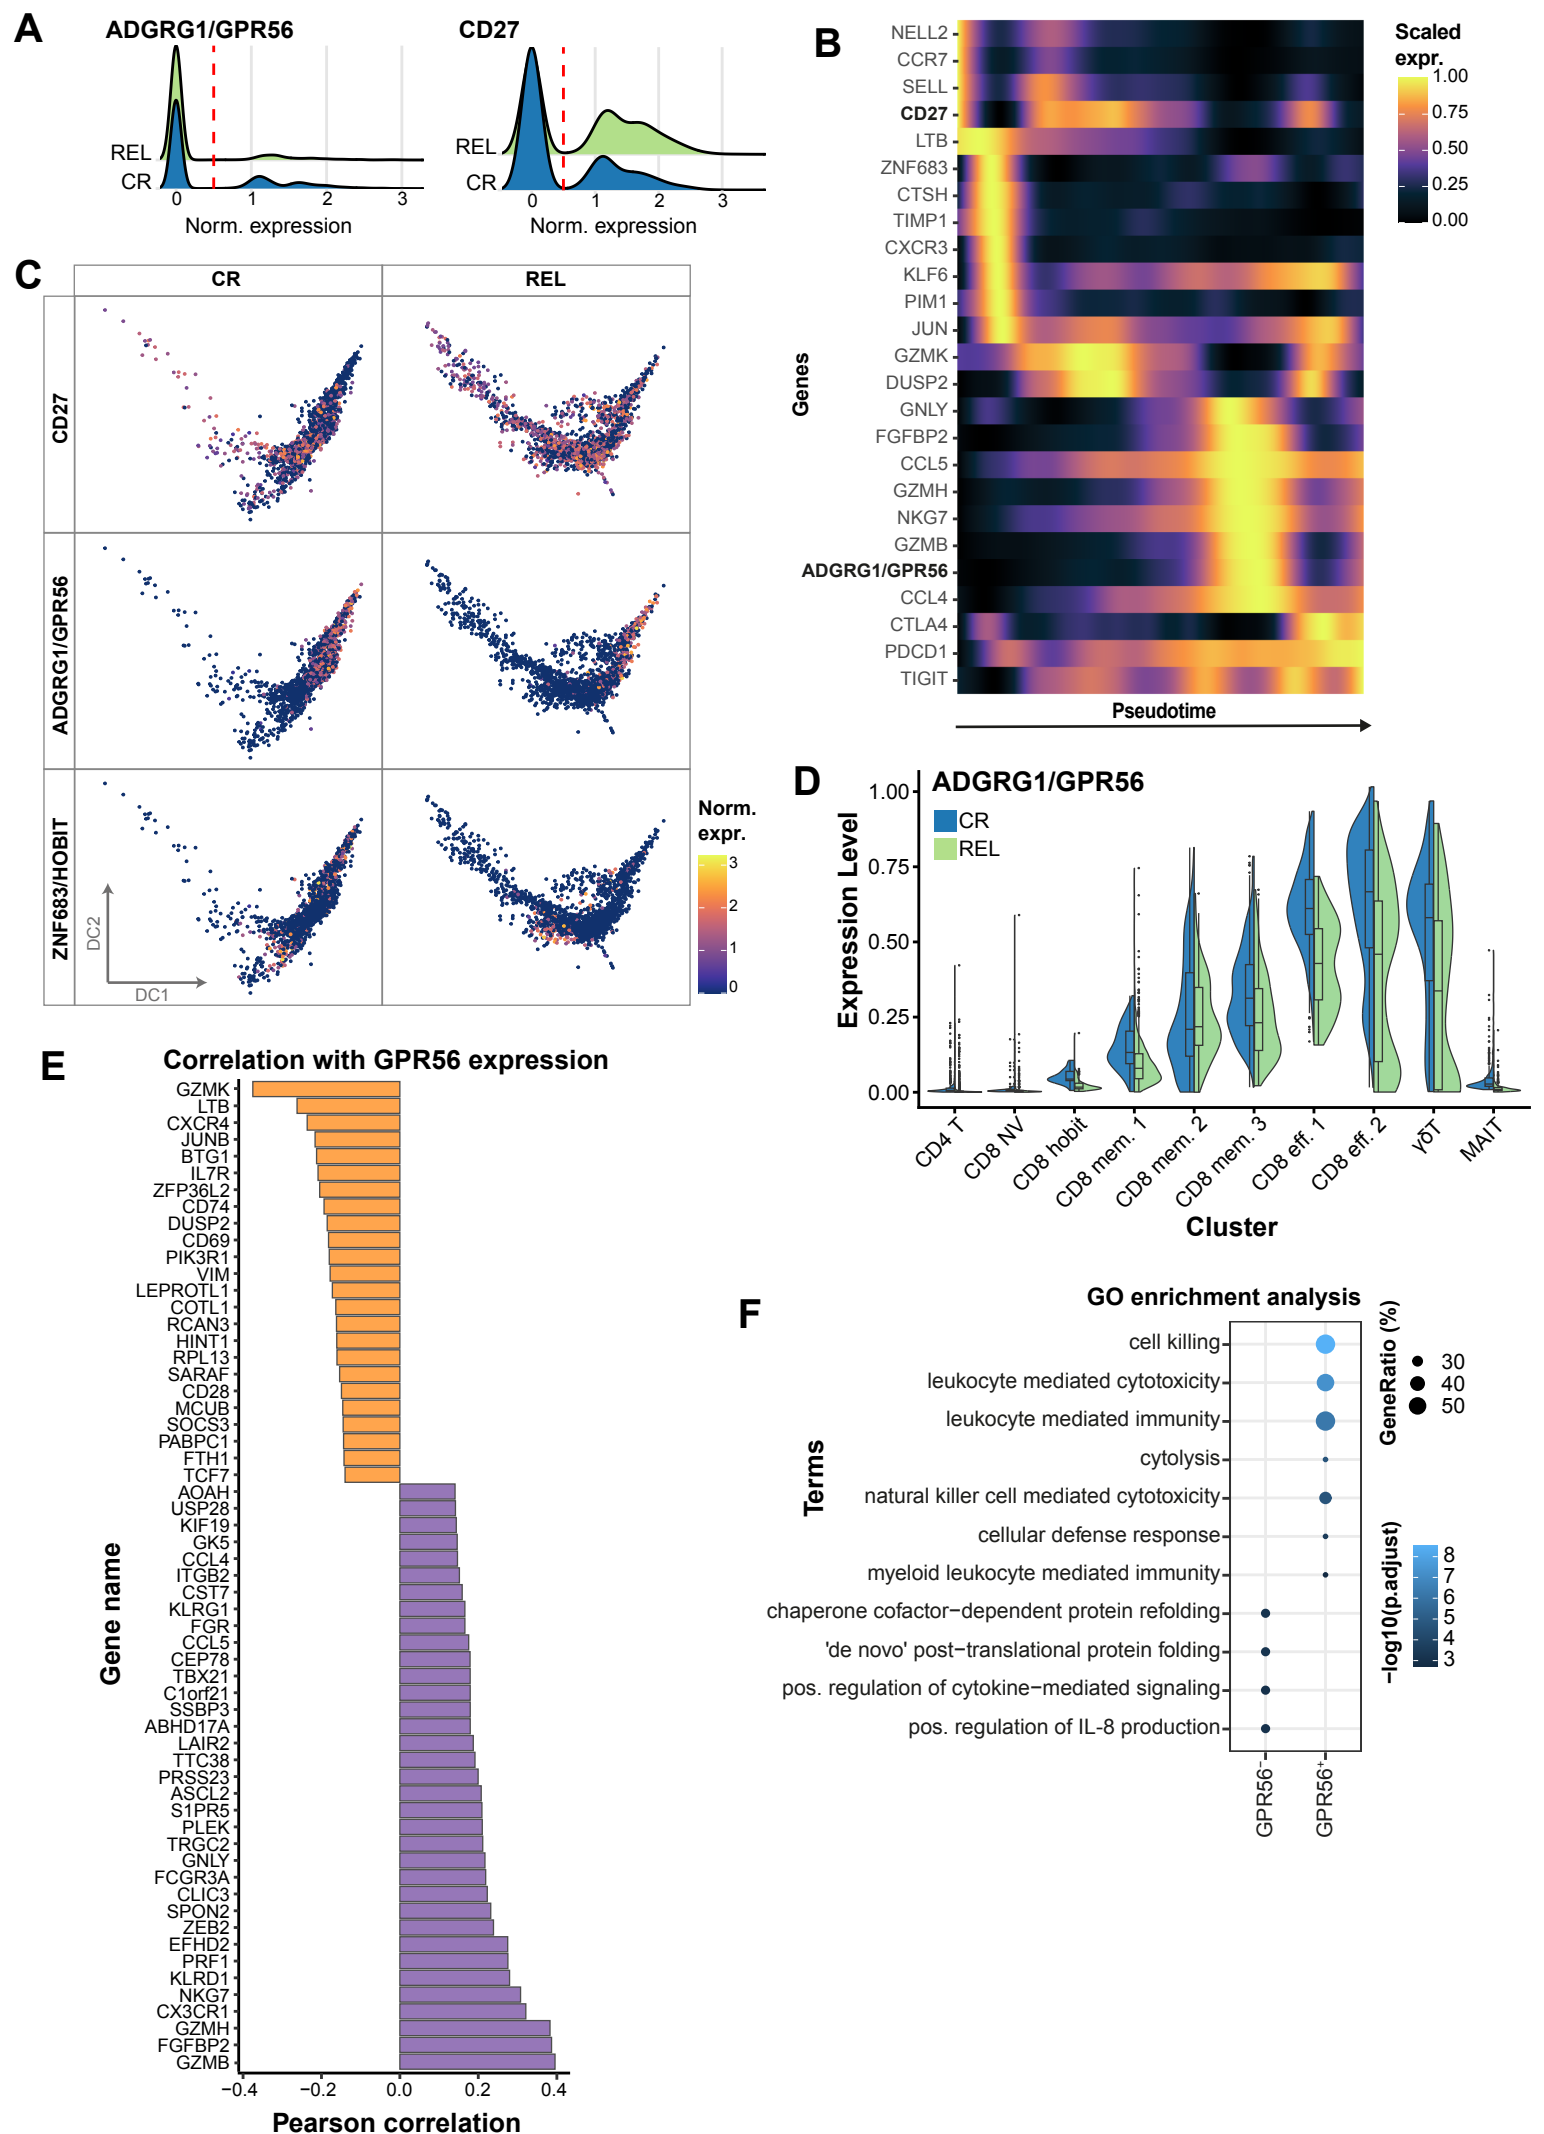

# Supplemental Figure 11

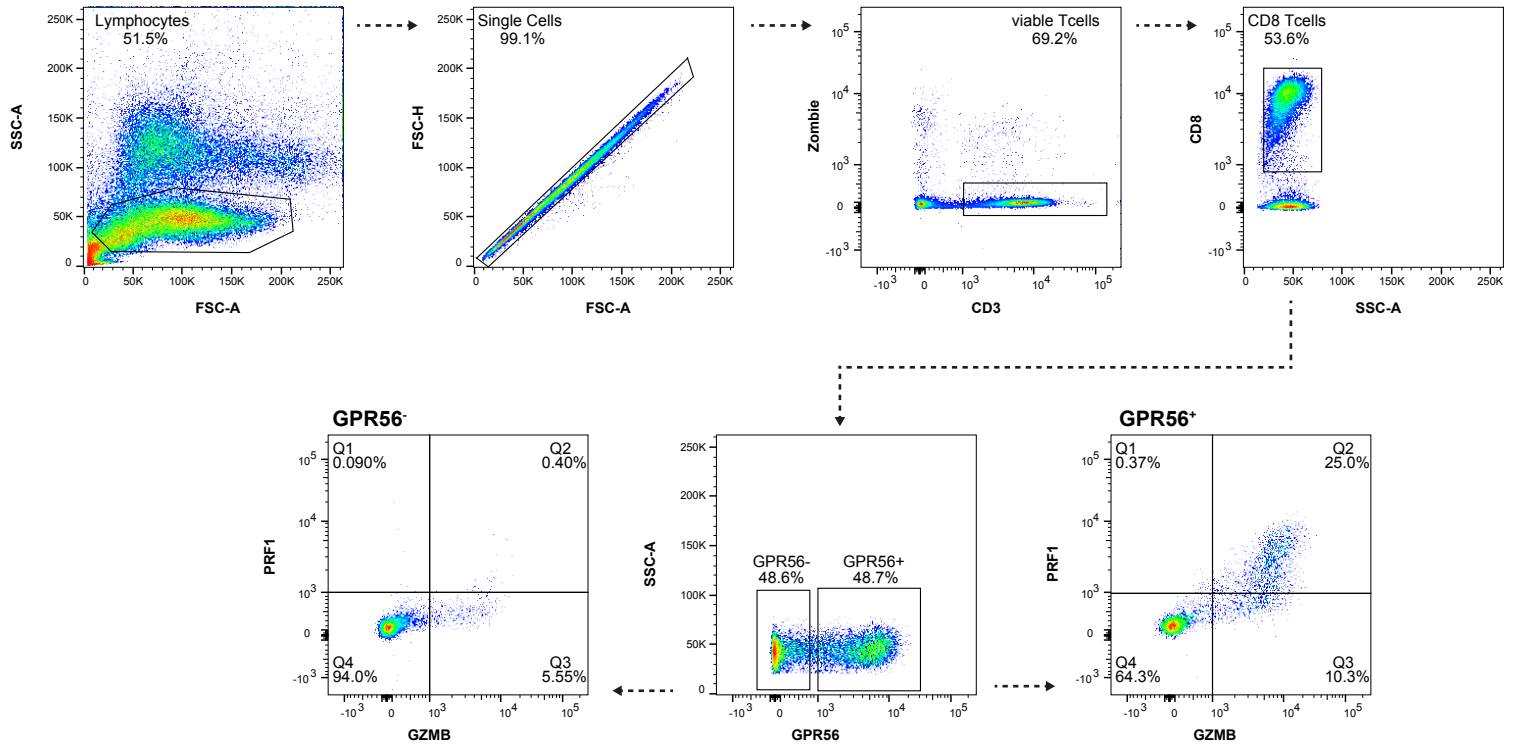

# Supplemental Figure 12

**A**

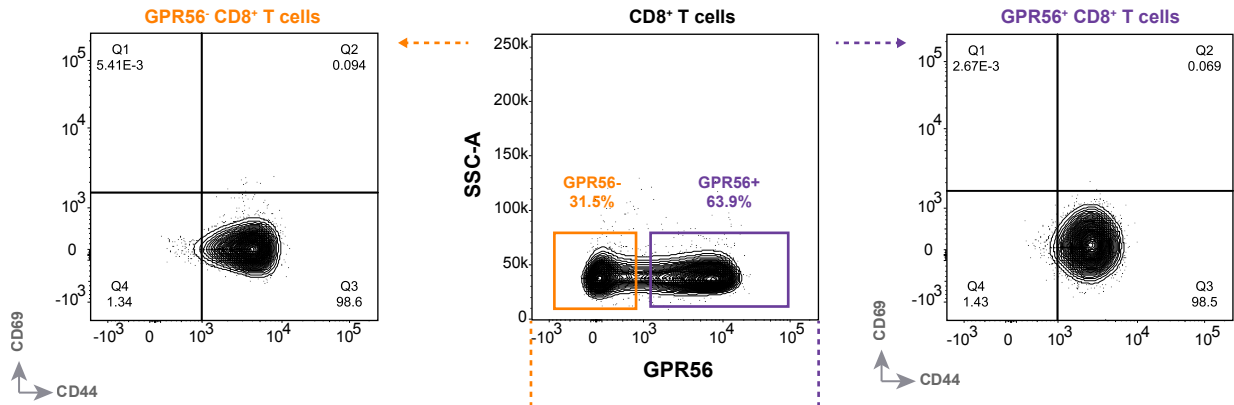

**B**

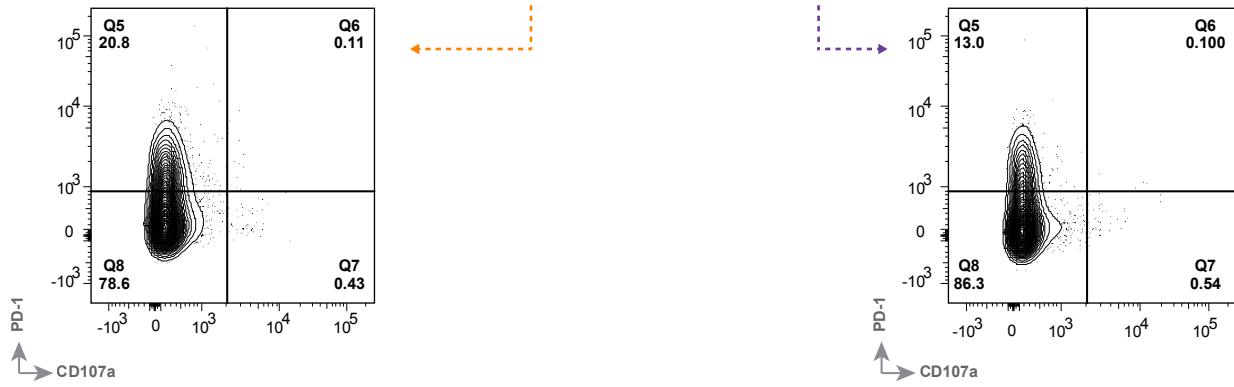

**C**

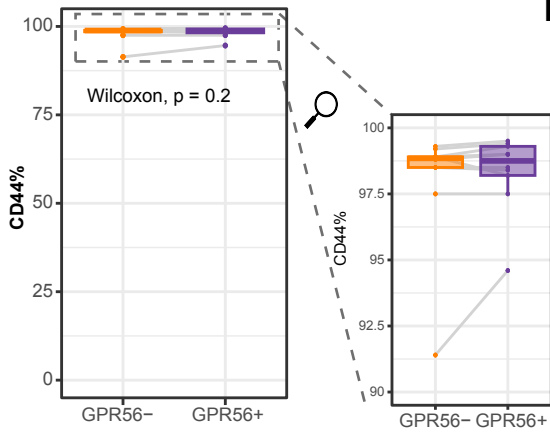

**D**

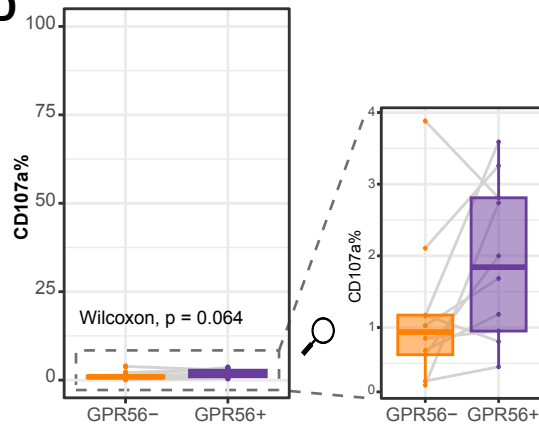

**E**

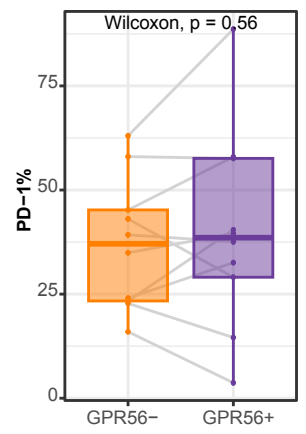

**F**

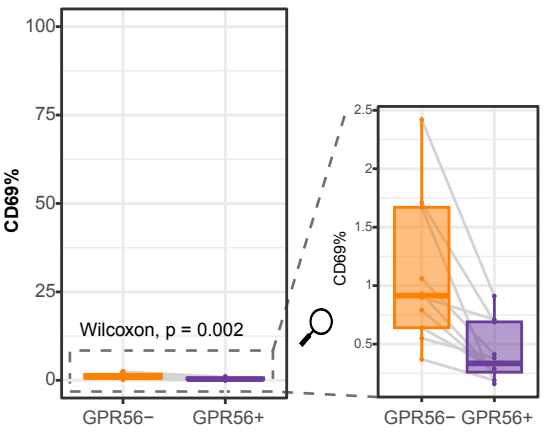

**G**

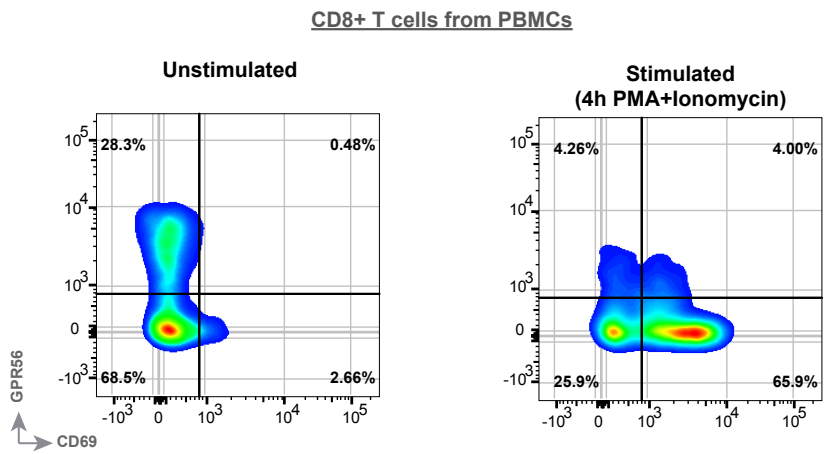

# Supplemental Figure 13

**A**

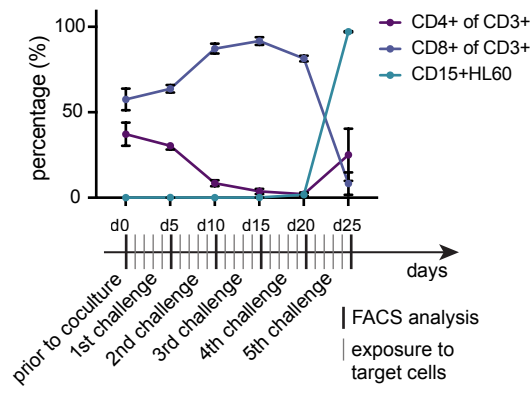

**B**

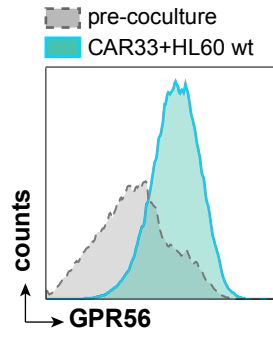

**C**

**GPR56+% on CD8+ T cells**

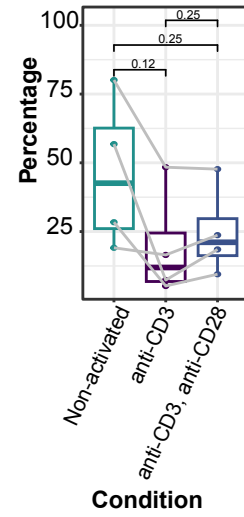

**D**

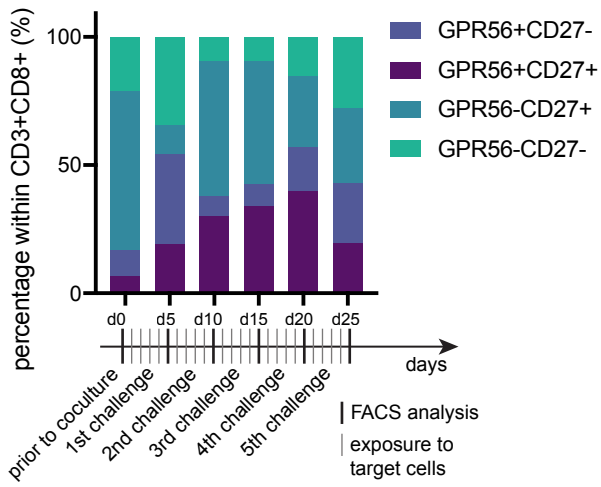

# Supplemental Figure 14

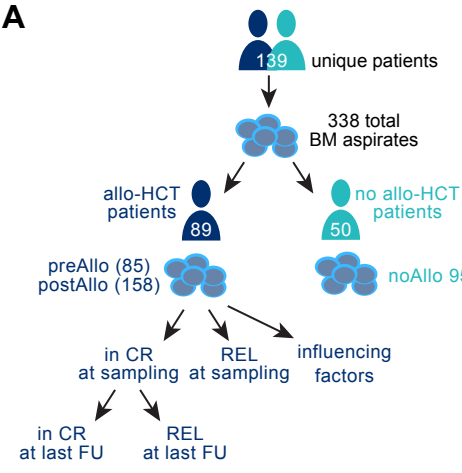

**B Panel 1 & 2**

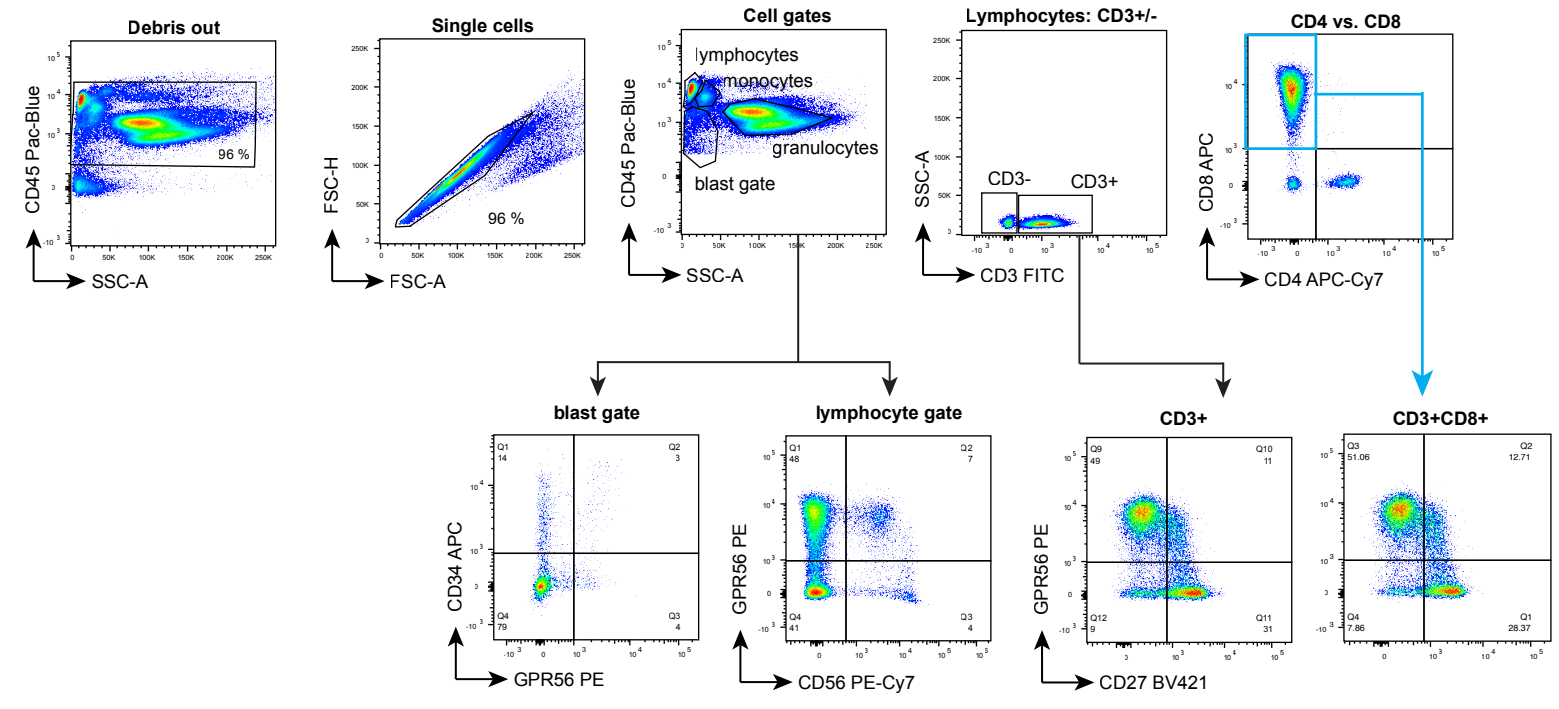

**C Panel 3**

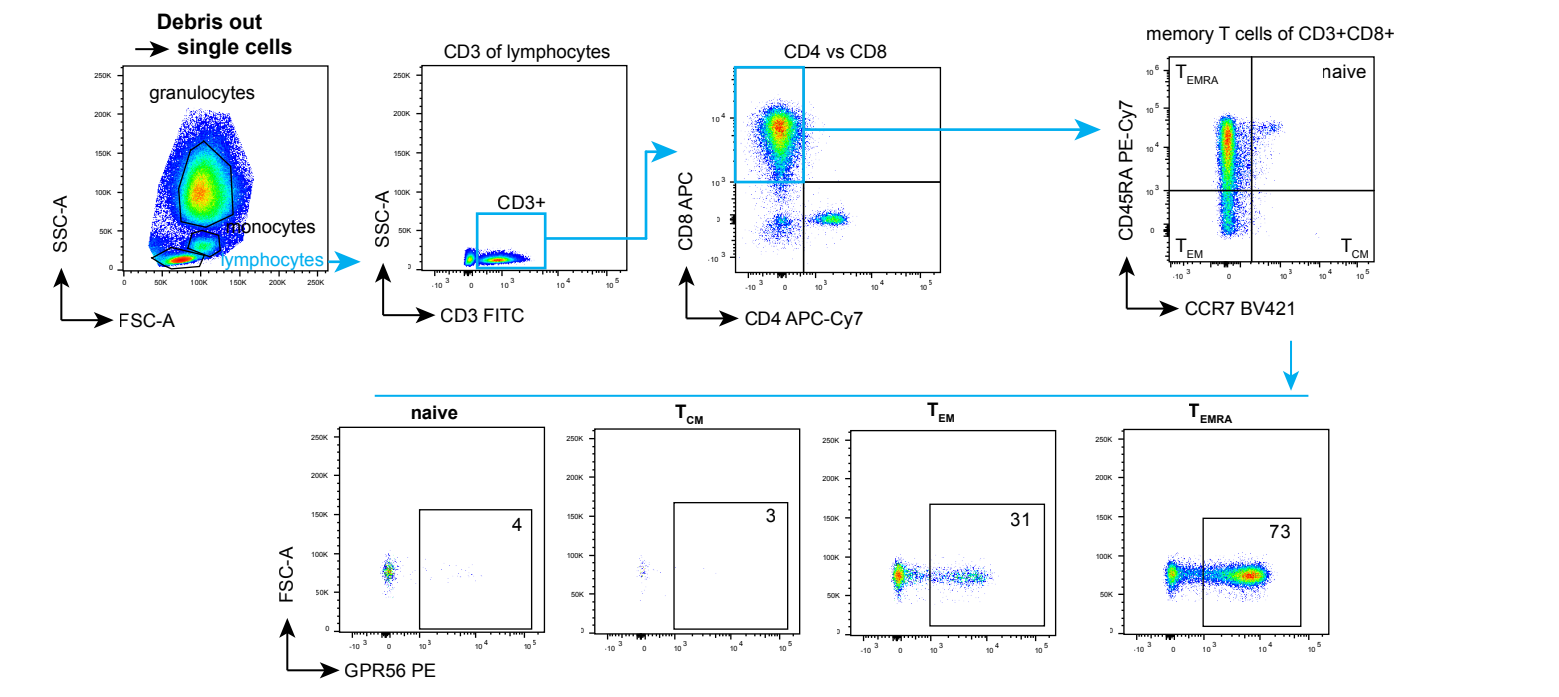



# Supplemental Figure 15

**A**

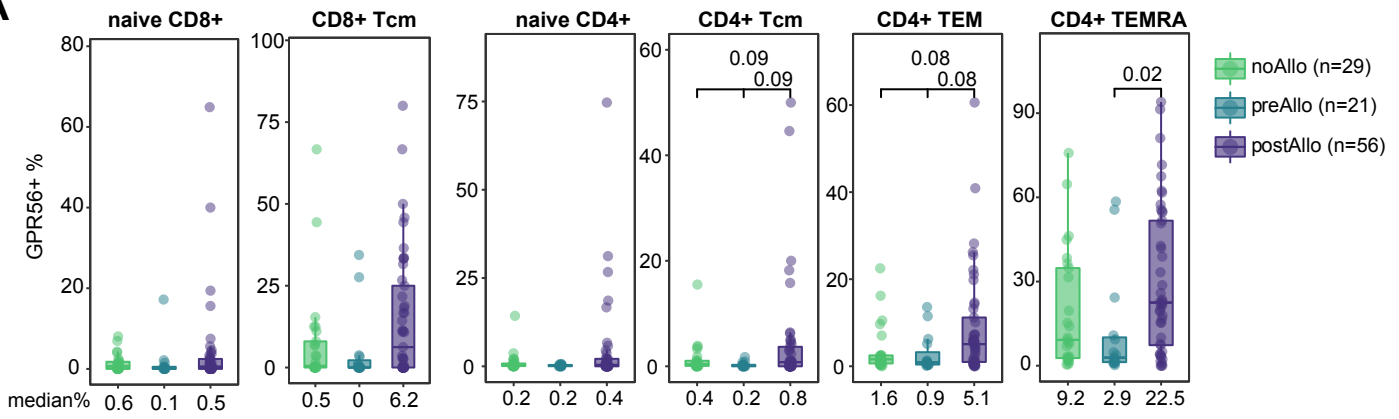

**B**

## CD8+TEMRA

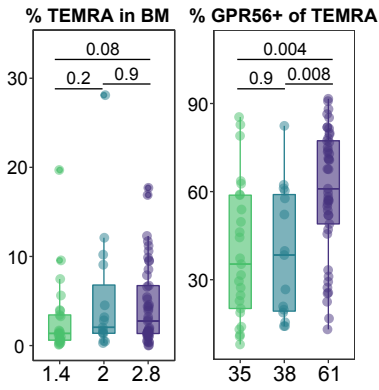

**C**

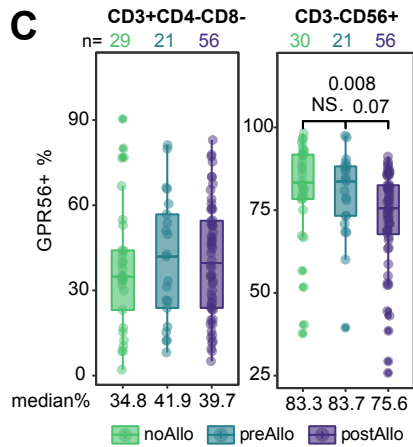

**D**

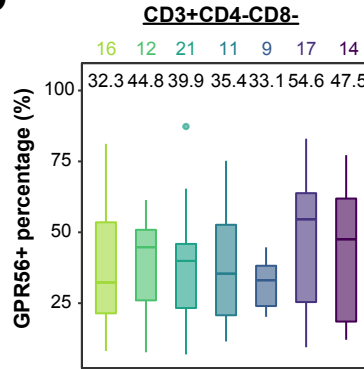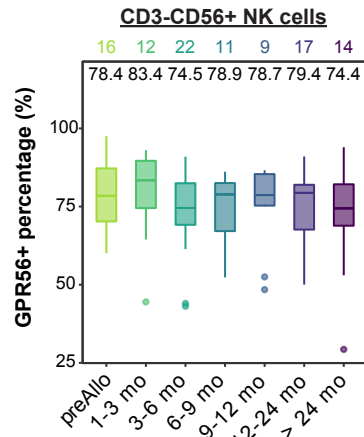

\* CR samples only

**E**

## CD4+ TEMRA CR patients

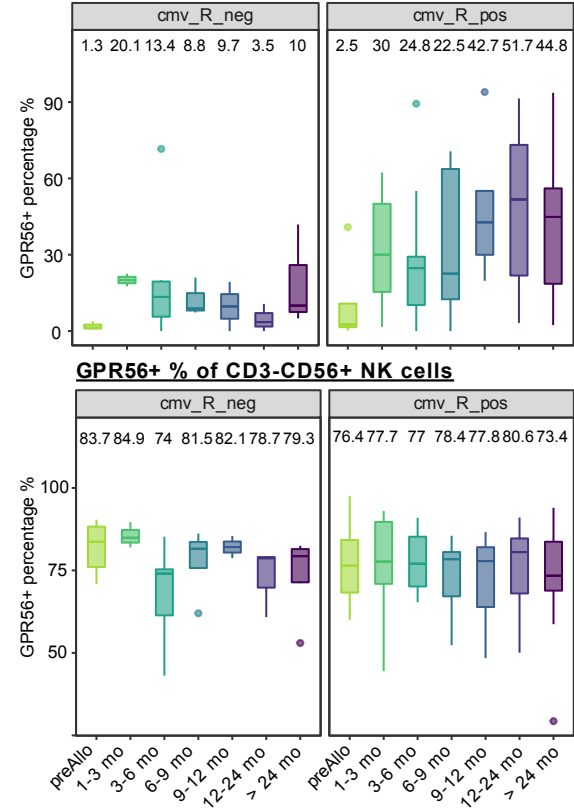

# Supplemental Figure 16

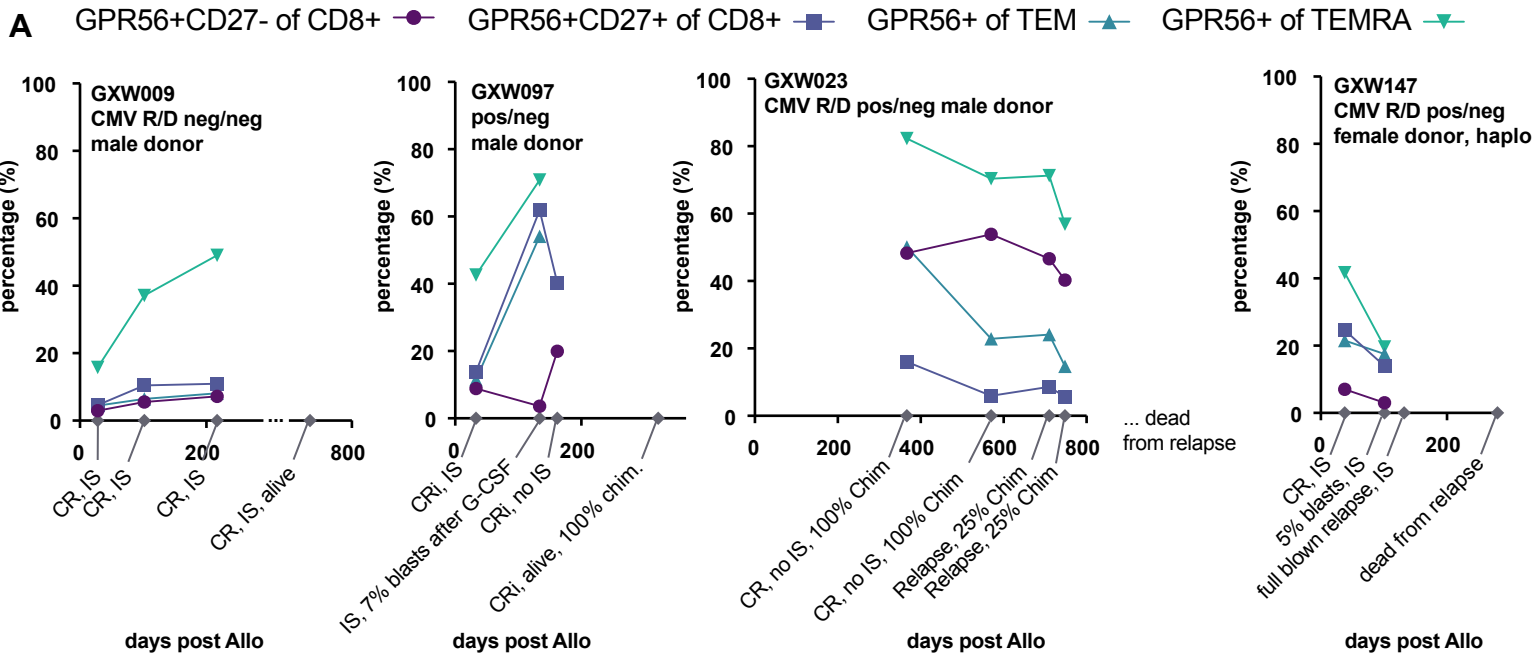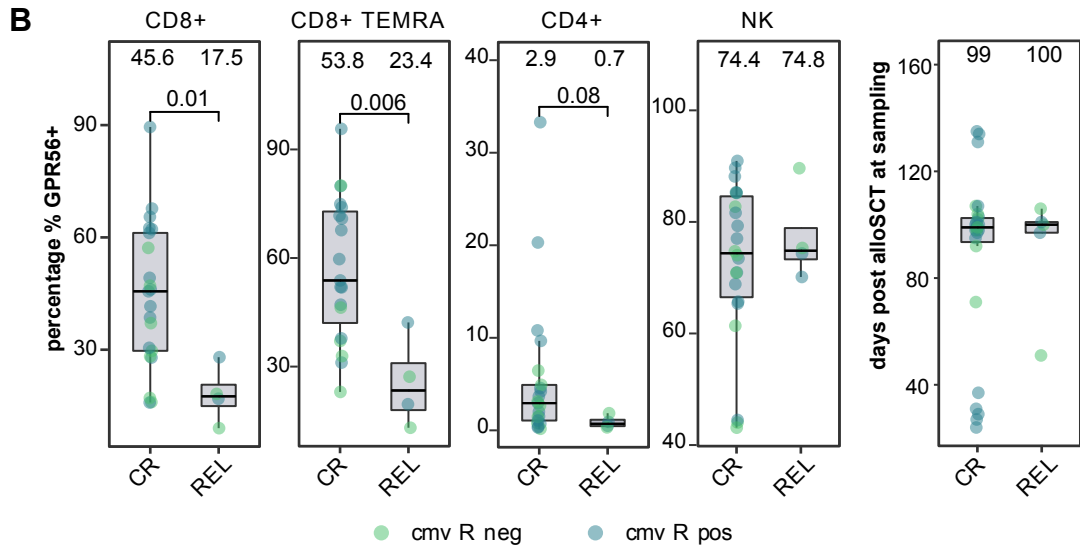

selection: only first 6 months post allo-HCT and in CR at sampling

# Supplemental Figure 17

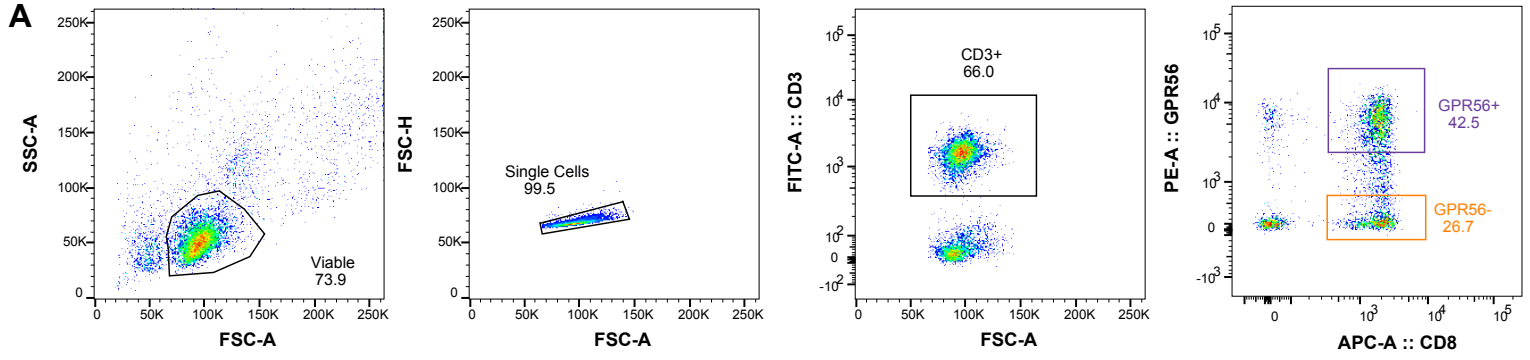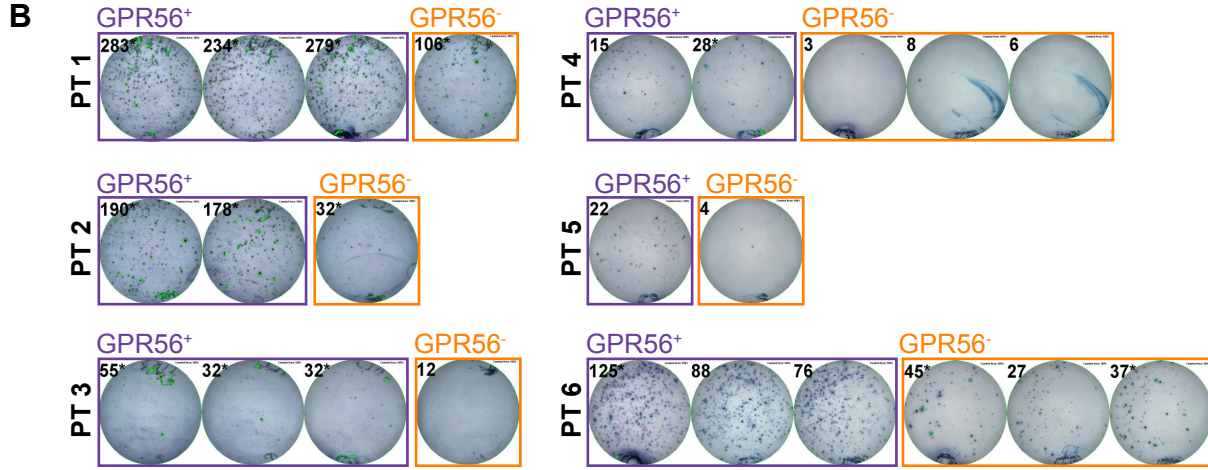

**C** *Non-matched* AML blasts & T cells

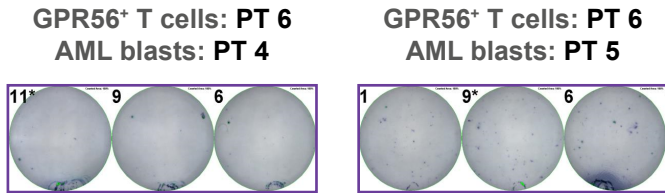

Supplement: BLOOD_BLD-2023-021815-mmc1.pdf [file BLOOD_BLD-2023-021815-mmc1.pdf]
